1 **3D Mapping Reveals Network-specific Amyloid Progression and Subcortical**  
2 **Susceptibility**

3 Canter RG<sup>\*1</sup>, Choi H<sup>\*4</sup>, Wang J<sup>1</sup>, Watson LA<sup>1</sup>, Yao CG<sup>1</sup>, Abdurrob F<sup>1</sup>, Bousleiman SM<sup>1</sup>, Delalle  
4 I<sup>+2</sup>, Chung K<sup>+1,3,4</sup>, Tsai L-H<sup>+1</sup>

5  
6 \*These authors contributed equally to this work.

7 +Co-corresponding authors.

8  
9 <sup>1</sup>The Picower Institute for Learning and Memory, Department of Brain and Cognitive Sciences,  
10 Massachusetts Institute of Technology. Cambridge, MA

11 <sup>2</sup>Department of Pathology and Laboratory Medicine, Boston University School of Medicine,  
12 Boston, MA

13 <sup>3</sup>Department of Chemical Engineering, MIT, Cambridge, MA

14 <sup>4</sup>Institute for Medial Engineering and Science (IMES), MIT, Cambridge, MA

15  
16  
17 **Abstract**

18 Alzheimer's disease is a progressive, neurodegenerative condition for which there is no cure.  
19 Prominent hypotheses posit that accumulation of beta-amyloid (A $\beta$ ) peptides drives the  
20 neurodegeneration that underlies memory loss, however the spatial origins of the lesions remain  
21 elusive. Using SWITCH, we created a spatiotemporal map of A $\beta$  deposition in a mouse model of  
22 amyloidosis. We report that structures connected by the fornix show primary susceptibility to A $\beta$   
23 accumulation and demonstrate that aggregates develop in increasingly complex networks with  
24 age. Notably, the densest early A $\beta$  aggregates occur in the mammillary body coincident with  
25 electrophysiological alterations. In later stages, the fornix itself also develops overt A $\beta$  burden.  
26 Finally, we confirm A $\beta$  in the mammillary body of postmortem patient specimens. Together, our  
27 data suggest that subcortical memory structures are particularly vulnerable to A $\beta$  deposition and  
28 that functional alterations within and physical propagation from these regions may underlie the  
29 affliction of increasingly complex networks.  
30

31 **Author Contributions:**

32 RGC, KC, L-HT, ID conceived of the work and planned the experiments.

33 RGC, HC, JW, LAW, CGY, FA, SMB performed experiments and analyzed data.

34 HC built the custom microscope.

35 RGC, L-HT, KC, ID wrote the manuscript.

36 **Introduction**

37 Cognitive impairments attributable to Alzheimer's disease (AD) will affect millions of individuals  
38 in the next decade, however the etiology of the disease remains unknown.<sup>1</sup> The results from  
39 decades of research support the hypothesis that the accumulation of toxic amyloid-beta  
40 peptides (A $\beta$ ) in the brain contributes to the onset and progression of AD.<sup>2,3</sup> The hypothesis was  
41 initially based on the discovery that mutations in the A $\beta$  precursor protein (APP) and its  
42 processing enzymes cause autosomal dominant, inherited, familial AD (FAD).<sup>4</sup> Subsequent  
43 preclinical studies demonstrating that the A $\beta$  peptides resulting from these mutations induces  
44 synaptic loss and neuronal death *in vitro* and *in vivo* have further established the acute toxicity  
45 of aggregate forms of the peptide on neural substrate, which suggests they directly influence the  
46 neurodegeneration observed in different subtypes of AD.<sup>5-7</sup> In addition to cellular harm,  
47 amyloidosis in murine models of AD contributes to AD-like memory impairments, hippocampal  
48 synaptic loss, and electrophysiological alterations -- changes that are also observed in human  
49 patients.<sup>8-10</sup> This data not only links lesions to dementia in FAD, but also provides a basis for  
50 understanding the etiology of the sporadic form of the disease. Despite the link between amyloid  
51 toxicity and neurodegeneration, the precipitating events that trigger A $\beta$  accumulation,  
52 deposition, and propagation which initiate AD remain unclear.

53  
54 One impediment to understanding A $\beta$  deposition has been identifying the brain regions most  
55 vulnerable to A $\beta$  plaques. The first studies using postmortem brain sections from AD patients'  
56 brains suggested that primary accumulation occurs in the neocortex with subsequent spread of  
57 aggregates to deeper structures implicated in learning and memory.<sup>11</sup> However, due to the use  
58 of post-mortem specimens, these reports could not definitively link evidence of amyloid  
59 deposition to the eventual development of AD. Although recent advances in positron emission  
60 tomography (PET) imaging have enabled longitudinal patient imaging studies that confirm the  
61 importance of cortical A $\beta$  in the diagnosis and prediction of AD progression,<sup>12,13</sup> they have  
62 largely not reported the contributions of deeper structures to A $\beta$  load and spread.<sup>13,14</sup>  
63 Intriguingly, while cortical A $\beta$  does correlate with disease status in patients,<sup>15,16</sup> many cognitively  
64 healthy individuals also have high levels of cortical A $\beta$ .<sup>17</sup> The discrepancy between cortical  
65 accumulation and cognitive impairment suggests that unexplored A $\beta$ -induced changes in the  
66 brain contribute to memory-related alterations in AD.<sup>18</sup>

67  
68 Increasing evidence suggests that distributed memory networks are particularly affected by A $\beta$   
69 in AD. Some lines of investigation demonstrate alterations in high-level cortical networks like the

70 default mode network (DMN),<sup>14,19</sup> while other recent studies show core alterations in  
71 fundamental deep memory structures that are part of the limbic system.<sup>10,20–22</sup> Though the  
72 cognitive and memory networks implicated by patient imaging somewhat overlap, there are  
73 distinct brain areas and functions that the networks do not share, leaving the hypotheses at  
74 odds. Whether the divergence arises from technical considerations or has unaddressed  
75 biological significance remains unknown, and still unexplored is the question of whether specific  
76 areas show differential susceptibility that is not seen with bulk detection. We hypothesized that  
77 some of the discrepancies in observed network susceptibility may be due to the difficulties in  
78 staging patient AD progression, which can be affected by variable pathological load,<sup>18</sup> as well as  
79 by socioeconomic, lifestyle, and genetic factors.<sup>23</sup>

80

81 To overcome the variability in human disease, in this work, we capitalize on the temporal  
82 precision of murine models harboring FAD mutations to map amyloid progression at high-  
83 resolution throughout the brain.<sup>24,25</sup> We use optimized techniques for whole-brain SWITCH  
84 immunolabeling<sup>26</sup> to create an unbiased, spatiotemporal map of A $\beta$  deposition. Our  
85 observations reveal early subcortical susceptibility to amyloidosis in regions connected by the  
86 fornix, such as the mammillary body, which shows concurrent functional alterations alongside  
87 aggregate formation. The four-dimensional (4D) nature of the data also reveal potential  
88 mechanisms of propagation along white matter tracts and suggests that pathological changes  
89 within long-range projections that connect memory and cognitive networks may contribute to  
90 disease progression.

91

## 92 **Results**

93 Using optimized system-wide control of interaction time and kinetics of chemicals (SWITCH)  
94 techniques (Figure 1a) that enable homogenous, whole-brain immunolabeling,<sup>26</sup> we created a  
95 spatially unbiased, temporally precise map of amyloidosis in a murine model of AD. We chose  
96 the 5XFAD transgenic mouse line because it is a widely-used model of AD-like pathology that  
97 shows an age-dependent increase in A $\beta$  aggregates and alterations in hippocampal  
98 physiology.<sup>8,25</sup> Although the SWITCH techniques are widely applicable to many antibodies and  
99 target proteins,<sup>26</sup> we discovered that we needed to further refine the buffer systems to achieve  
100 homogenous whole brain labeling with our chosen amyloid antibody. In our optimized SWITCH  
101 system, we switch pH and ionic strength of the buffers to actively modulate antibody-antigen  
102 binding kinetics.<sup>27</sup> In the first step, we use high pH and high ionic strength buffer to slow the  
103 binding reaction so that antibodies can penetrate deep into the sample. Next, the buffer is

Canter, Choi, et al: 3D Mapping of network-specific

104 titrated to a physiological pH and ionic strength to allow antibodies to rapidly bind to targets. By  
105 employing this system, we were able to achieve homogenous labeling throughout thick tissue  
106 sections (Supplemental Figure 1). To further optimize the conditions for our chosen amyloid  
107 antibody, we used aged animals with the expectation that they would show wide-spread  
108 aggregate accumulation based on previous reports.<sup>25,28</sup> Using the optimized SWITCH protocols  
109 to label a whole brain, we observed homogenous immunolabeling of A $\beta$  aggregates throughout  
110 the entire tissue in aged mice (Supplemental Figure 2, Video 1). These large tissue volume  
111 techniques allow analyses of intact specimens without the loss of critical information to the size  
112 limitations and directional segmentation that are inherent in sectioning.<sup>29</sup> To our surprise, careful  
113 examination of the entire brain revealed that, in addition to deposition in cortical and  
114 hippocampal regions known to be affected in AD, significant accumulation of A $\beta$  was also  
115 evident in subcortical regions.

116  
117 To determine the reproducibility of the protocols and replicate the unexpected labeling, we  
118 repeated the procedure in a cohort of 5XFAD animals aged 12 month (12M) (Figure 1B, Video  
119 2d). In the 12M animals, we observed substantial plaque burden throughout the brain. Region  
120 specific quantification from white matter-based hand annotation of three-dimensional (3D)  
121 images (Supplemental Figure 3) demonstrated area-specific accumulation in AD-associated  
122 areas (Figure 1C). The regions harboring A $\beta$  included the retrosplenial cortex (RSP),  
123 hippocampus (HPC), subiculum (SUB), and pre-frontal cortex (PFC), and importantly,  
124 aggregates were largely absent from areas thought to be relatively spared from amyloidosis in  
125 AD like the caudoputamen (CP) and midbrain (MD) (D'Agostino and Pearson normality test; K2  
126 = 94.61,  $p < 0.0001$ , passed normality = No; Friedman test; Q = 114.2,  $p < 0.0001$ ). This  
127 suggests that our labeling techniques are able to homogeneously and specifically label A $\beta$   
128 aggregates, and that accumulation of the peptide is restricted within particular brain areas.  
129 Unexpectedly, the highest aggregate density by rank in the 12M animals appeared within  
130 specific subcortical regions, namely the mammillary body (MB) and septum (SEPT), which  
131 confirmed our initial observations.

132  
133 Although the MB and SEPT had the densest A $\beta$ , with data from aged animals we could not  
134 determine whether this pattern emerged because aggregates in the 5XFAD animals develop  
135 uniformly throughout the brain over time, thus making these smaller structures appear more  
136 dense; or if these high-density regions show unique vulnerability to elevated levels of A $\beta$ ,  
137 leading to earlier or more significant aggregation. To observe how the pattern emerged, we

Canter, Choi, et al: 3D Mapping of network-specific

138 used our optimized SWITCH protocol to analyze a time course of 5XFAD cohorts including mice  
139 aged for 6, 4, 2, and 1 months (6M, 4M, 2M, 1M respectively) (Video 2a-c, Figures 1D-G).  
140 Quantifying A $\beta$  density in specific regions across multiple animals at each time point, we  
141 observed increasingly precise aggregation with decreasing age in a pattern that was consistent  
142 across individuals. At 6M, 5XFAD animals had region-specific aggregation, with areas harboring  
143 significantly different densities of amyloid. (Figures 1D, 1G; D'Agostino and Pearson normality  
144 test;  $K2 = 70.12$ ,  $p < 0.0001$ , passed normality = No; Friedman test;  $Q = 68.56$ ,  $p = 0.0171$ ). To  
145 better understand the brain areas that contribute to region-specific aggregation in our data, we  
146 performed hierarchical clustering analysis, which revealed that at 6M, areas associated with the  
147 olfactory and cortico-limbic system (e.g. basolateral amygdalar complex [BLA], piriform cortex  
148 [PIR], entorhinal cortex [EC]) show most similar levels of A $\beta$  (Supplementary Figure 4B;  
149 hierarchical clustering, single linkage- nearest distance). This is particularly interesting because  
150 it suggests that network-level distribution of A $\beta$  is relatively uniform within functional networks  
151 and also identifies circuits that underlie behaviors known to show alterations in early AD.<sup>30</sup>

152  
153 Looking at younger animals to determine the progression in the predictable, genetic murine  
154 models, we next saw that at 4M the data continues to demonstrate area-specific aggregation  
155 and our analyses show non-normal, non-linear pattern to the regional distribution (Figure 1E,  
156 1G; D'Agostino and Pearson normality test;  $K2 = 51.67$ ,  $p < 0.0001$ , passed normality = No;  
157 Non-linear Regression;  $y = -354.1 \cdot \ln(x) + 1200.9$ ,  $R^2 = 0.82465$ ). The skewed data suggest that  
158 fewer regions have high burden, consistent with increasingly specific patterns of aggregation at  
159 the earliest disease stages. To determine what regions are affected at this 4M age, we looked at  
160 our clustering analyses (Supplementary Figure 4C), which revealed that regions homologous to  
161 the those in the DMN (e.g. restroplenia [RDP], anterior cingulate [ACC], and parietal cortices)<sup>31</sup>  
162 are better correlated to each other, with the exclusion of olfactory and limbic areas from the  
163 cluster. To understand whether the DMN is the earliest affected network as suggested by many  
164 human functional studies,<sup>32,33</sup> we next looked at 2M animals. At 2M, animals failed to  
165 demonstrate significant differences across brain areas (Figure 1F; D'Agostino and Pearson  
166 normality test;  $K2 = 105.2$ ,  $p < 0.0001$ , passed normality = No; Friedman test;  $Q = 58.18$ ,  $p =$   
167  $0.1073$ ), suggesting little to no specific aggregation patterns. However, our analyses revealed  
168 that while many areas did not cluster, there was correlated deposition in the 2M animals within a  
169 few areas (Supplementary Figure 4D). These key nodes of early aggregation were the MB,  
170 SEPT, and SUB – regions that connect the HPC to the rest of the Papez memory circuit.<sup>34</sup> At  
171 1M animals did not show discernable amyloid deposits (data not shown), suggesting that the

172

Figure 1

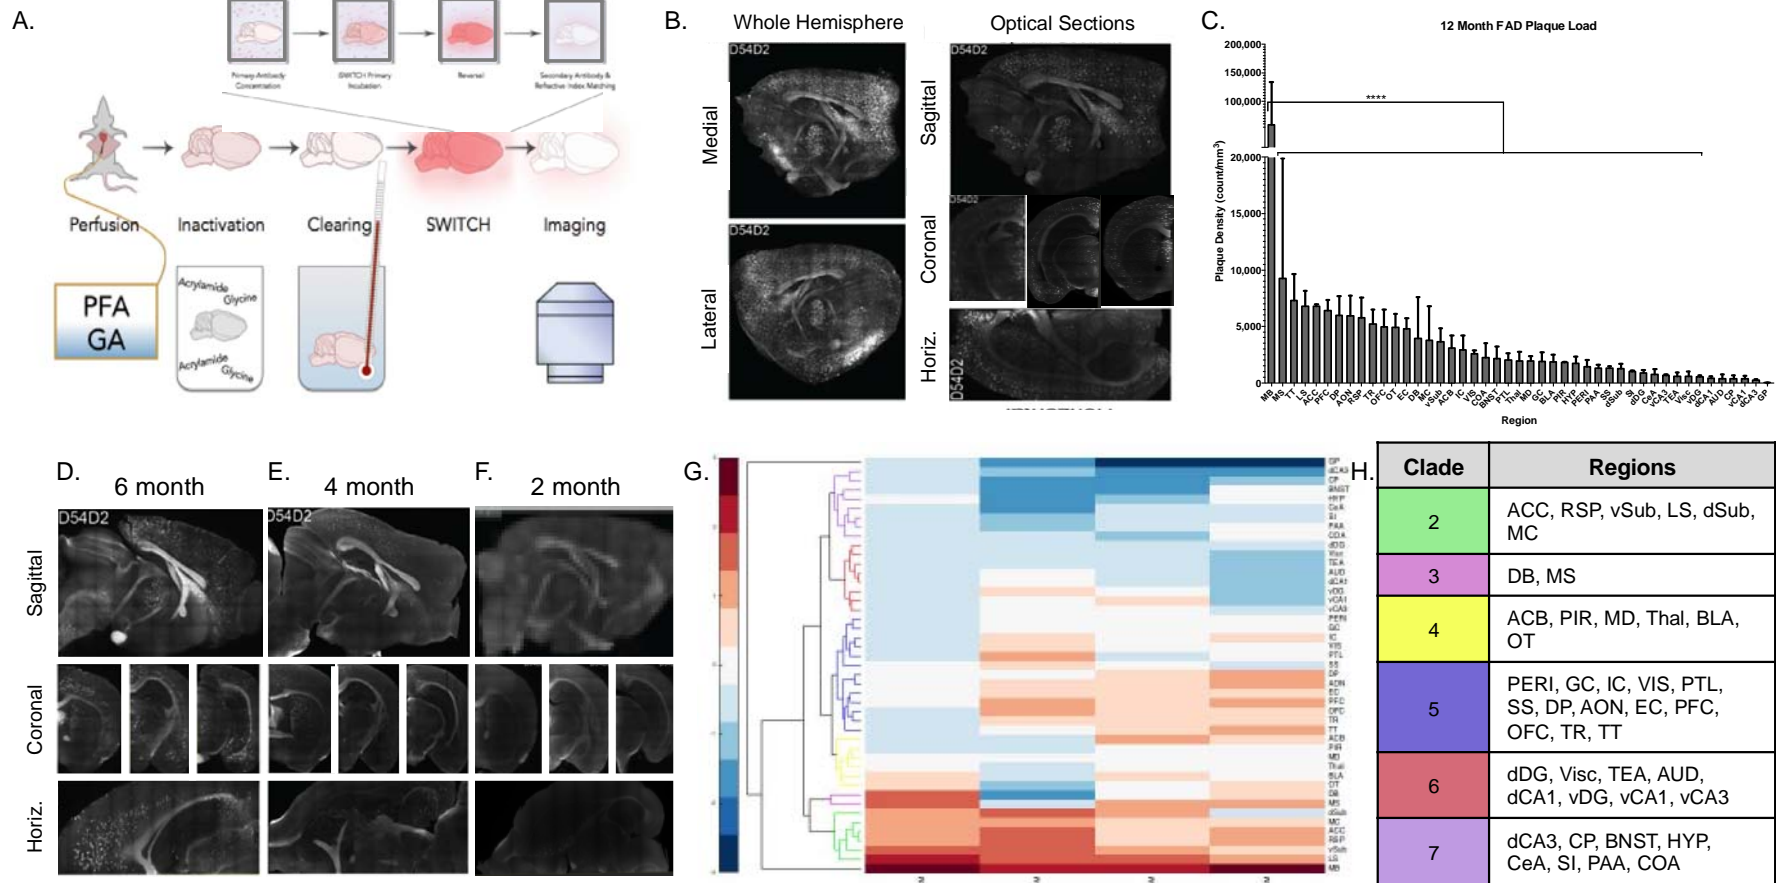

**Figure 1: SWITCH labeling reveals network propagation of amyloid pathology.** A) Diagram of protocol for our optimized SWITCH labeling. B) Representative images of the 12 month 5XFAD brains. C) Amyloid deposit density rank-ordered by region in 12 month aged 5XFAD mice. D-F) Representative images of amyloid labeling from D) 6 month, E) 4 month, and F) 2 month 5XFAD mice. G) Clustergram of the hierarchical clustering by density across the four time points examined. Coloring of the dendrogram represents the fifth level from the top and these clades contain regions with similar amyloid deposition patterns. H) Lists of regions contained in colored groups from panel G. \* $p \leq 0.05$ ; \*\* $p \leq 0.01$ ; \*\*\*\* $p \leq 0.0001$ ; Graphs report Mean  $\pm$  Standard Deviation unless otherwise noted in the legend text. *Abbreviations:* ACC, anterior cingulate cortex; RSP, retrosplenial cortex; vSub, ventral subiculum; LS, lateral septum; dSub, dorsal subiculum; MC, motor cortex; DB, diagonal band; MS, medial septum; ACB, nucleus accumbens; PIR, piriform cortex; MD, midbrain; Thal, thalamus; BLA, basolateral amygdala; OT, olfactory tubercle; PERI, perirhinal and entorhinal cortices; GC, gustatory cortex; IC, insular cortex; VIS, visual cortex; PTL, posterior parietal association areas; SS, somatosensory cortex; DP, dorsal peduncular area; AON, anterior olfactory nucleus; EC, entorhinal cortex; PFC, prefrontal cortex; OFC, orbitofrontal cortex; TR, postpiriform transition area; TT, taenia tecta; dDG, dorsal dentate gyrus; Visc, visceral cortex; TEA, temporal association areas; AUD, auditory cortex; dCA1, dorsal CA1; vDG, ventral dentate gyrus; vCA1, ventral CA1; vCA3, ventral CA3; dCA3, dorsal CA3; CP, caudoputamen; BNST, bed nucleus of the stria terminalis; HYP, hypothalamus; CeA, centromedial amygdalar nuclei; SI, substantia innominata; PAA, piriform amygdalar area; COA, cortical amygdalar area.

173 deposition is not developmental and that the SUB, MB, and SEPT are uniquely susceptible to  
174 A $\beta$  aggregation at the earliest stages of disease pathology.

175  
176 One concern using transgenic models is whether the pattern is reflective of biologically  
177 interesting results, or a byproduct of the transgenic expression. To ascertain whether the  
178 subcortical aggregation pattern may be an artifact of the mouse transgene, we performed dual  
179 immunofluorescence for A $\beta$  peptides and *in situ* hybridization for the transgenic mRNA to  
180 correlate the location of A $\beta$  deposits with expression patterns of the transgene (Supplementary  
181 Figure 5A). Patterns of expression in 2 and 4-month animals looked similar and were combined,  
182 and the correlation analyses demonstrate that across the entire brain, transgenic RNA  
183 expression does not correlate with deposit location (Supplementary Figure 5B;  $\rho = -0.0728$ ,  $p =$   
184  $0.3588$ ). The insignificance of this result remains when split by region (Supplementary Figure  
185 5C). This data suggests that 5XFAD animals show biologically relevant, region-specific amyloid  
186 deposition. Combined with our clustering results (Figure 1H), our data show that the MB, SEPT,  
187 and SUB are particularly vulnerable to A $\beta$  deposition. Over time, the aggregates appear in  
188 regions homologous to the DMN. Following the DMN, lesions are detected throughout the  
189 extended limbic system, before finally developing throughout the entire forebrain. Thus we  
190 propose that A $\beta$  deposits start in susceptible subcortical structures, and spread to increasingly  
191 complex memory and cognitive networks with age.

192  
193 The detection of aggregates alone is not sufficient to demonstrate that the A $\beta$  we observe in the  
194 MB, SEPT, and SUB may contribute to A $\beta$ -related cognitive decline because it is unknown  
195 whether subcortical A $\beta$ , especially within diencephalic structures, induces the functional  
196 alterations thought to underlie early memory deficits in AD.<sup>9,22,35,36</sup> In our data, the MB shows the  
197 densest A $\beta$  at the earliest stages. The MB is downstream of both the SEPT and SUB,<sup>37</sup> and  
198 previous reports suggest that it is related to recall memory in humans<sup>38</sup> and has calcium-  
199 sensitive firing properties<sup>39</sup> that may render it particularly vulnerable to A $\beta$ -induced dysfunction.  
200 Thus, to test whether the observed aggregation leads to functional impairments within the  
201 subcortical structures, we performed *ex vivo* whole cell patch-clamp recordings in the MB in  
202 slices from 2M 5XFAD mice and littermate controls. 5XFAD MB neurons showed significantly  
203 increased excitability (Figures 2A-B, 2-way Repeated Measures ANOVA; Interaction:  $F_{(10,450)} =$   
204  $8.786$ ,  $p < 0.0001$ ; Genotype:  $F_{(1,45)} = 9.902$ ,  $p = 0.0029$ ), which is consistent with previous  
205 reports of neuronal hyperexcitability in the hippocampus in response to A $\beta$ .<sup>9,35</sup> Further  
206 examination showed that this excitability was not due to increased action potential threshold

207

Figure 2.

**Figure 2: The MB shows significant functional impairments** and loses its synaptic input. A) Representative action potential traces following current injection of 10pA (top row) and 100pA (bottom row) into MB neurons of 5XFAD animals (right column) compared to littermate controls (left column). B) Excitability curves showing increased firing rate of FAD+ across multiple steps of current injection. C) The action potential threshold of the cells does not change, neither does the D) after-hyperpolarization. E) The action potential amplitude is significantly decreased in 5XFAD animals and F) the resting membrane potential is also significantly decreased, both of which could underlie the excitability phenotype. Graphs represent Mean  $\pm$  Standard Deviation.

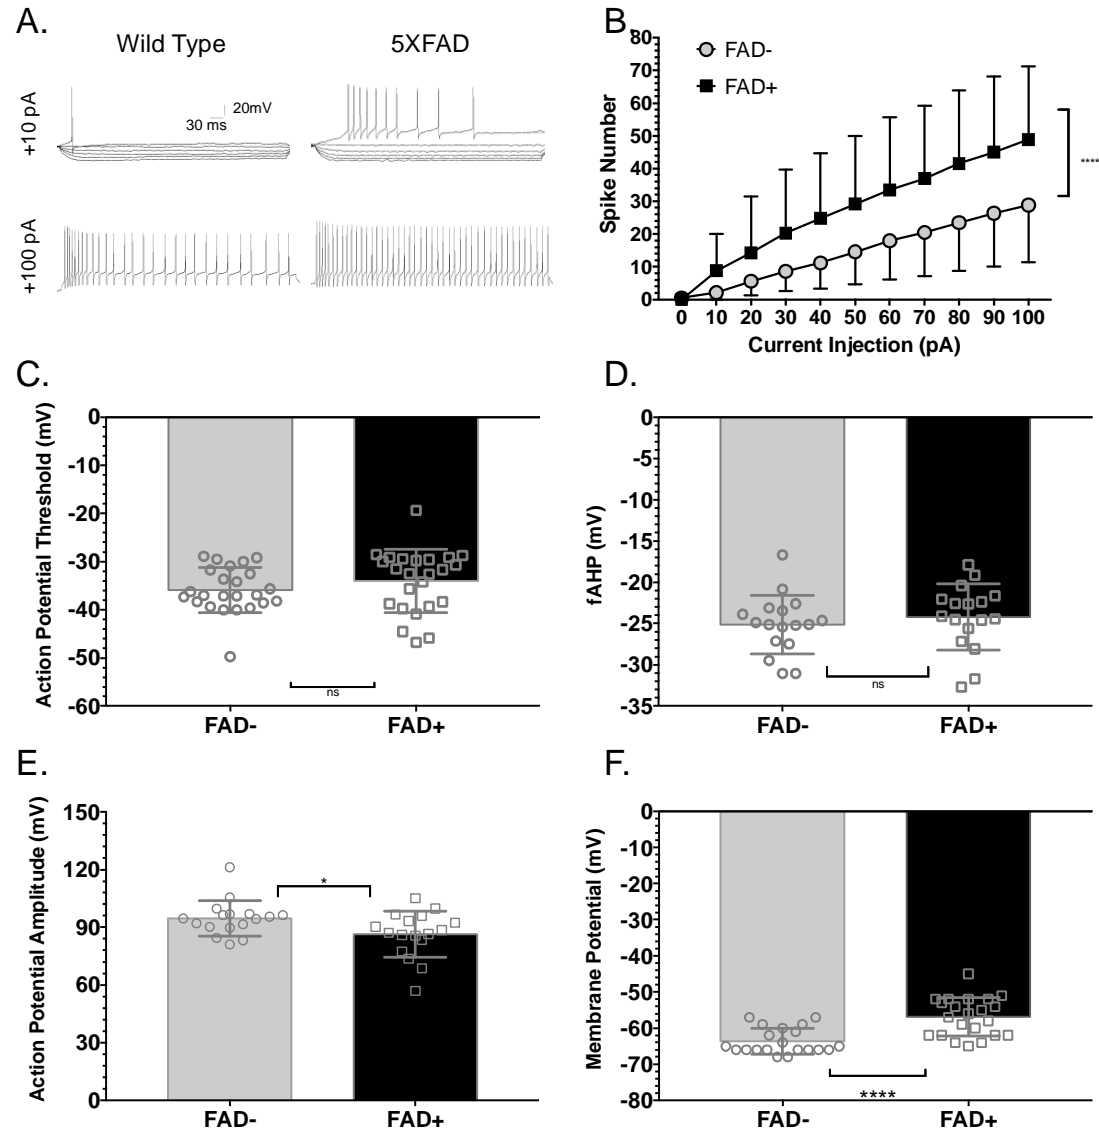



Canter, Choi, et al: 3D Mapping of network-specific

208 (Figure 2C, Unpaired Student's t-test;  $t_{(46)} = 1.146$ ,  $p = 0.2577$ ) or altered hyperpolarization  
209 dynamics (Figure 2D, Unpaired Student's t-test;  $t_{(32)} = 0.7107$ ,  $p = 0.4824$ ), but may be attributed  
210 to slightly increased action potential amplitude (Figure 2E, D'Agostino and Pearson Normality  
211 Test, FAD-:  $K2 = 11.09$ ,  $p = 0.0039$ , passed normality = No; FAD+:  $K2 = 4.217$ ,  $p = .1214$ ,  
212 passed normality = Yes; Mann Whitney U;  $U = 87.5$ ,  $p = 0.0497$ ) and a reduced resting  
213 membrane potential (Figure 2F, Unpaired Student's t-test;  $t_{(40)} = 4.807$ ,  $p < 0.0001$ ) in 5XFAD  
214 MB neurons compared to the WT controls. This is consistent with previous findings of altered  
215 resting membrane potential in non-pyramidal neurons of the HPC in a different murine model of  
216 AD,<sup>40</sup> revealing further consistencies in amyloid-driven alterations, despite differing cell-types  
217 and circuit structures.<sup>41</sup> Thus, our results suggest that early accumulation of A $\beta$  the MB of the  
218 5XFAD drives neuron-intrinsic hyperexcitability, which is characteristic of AD-related changes in  
219 neuronal activity and, in this early stage, may contribute to the onset of network dysfunction and  
220 memory impairment.<sup>9,35,40</sup>

221  
222 Our results demonstrating that the MB is particularly susceptible to early A $\beta$  deposition adds to  
223 the mounting evidence that implicates subcortical Papez circuitry in AD-related memory  
224 impairment in human patients,<sup>21,42-44</sup> however the relevance of these findings is tempered by  
225 mixed reports about the involvement of MB in human mild cognitive impairment (MCI) and AD  
226 patients.<sup>42,45,46</sup> Thus, to understand whether MB demonstrates A $\beta$  lesions over the course of AD,  
227 we acquired a small cohort of post-mortem mammillary bodies embedded in paraffin blocks  
228 from the Netherlands Brain Bank. The blocks contained mammillary bodies from individuals that  
229 died at each Braak and Braak stage<sup>47</sup> (Figure 3A). We cut traditional histology sections from the  
230 blocks (Figure 3B) that revealed numerous A $\beta$  deposits in the MB of AD patients at each stage,  
231 with none present in the healthy individual (Figure 3C, 3D). This finding is consistent with older  
232 reports of amyloid pathology in the region.<sup>43</sup> However, because the sections were thin and the  
233 deposits did not label strongly, we could not determine whether there was a stage-dependent  
234 increase in A $\beta$  within the MB. To test this, we used SWITCH methods to clear and label the  
235 entire banked MB specimen from each individual. 3D reconstruction of the labeled specimens  
236 (Figure 3E, Video 3) revealed substantial A $\beta$  burden in the MB of AD patients, but none in the  
237 MB from a healthy individual. Although the density of A $\beta$  deposits did not correlate with NFT  
238 accumulation reflected in advancing Braak stage (Figure 3F), individual aggregate volume did  
239 (Figure 3G). This suggests substantial early A $\beta$  deposition precedes overt dementia and that  
240 aggregates continue to expand as the largest ones in our small cohort were seen in the Braak V  
241 – AD patient. One additional interesting observation in the pathology sections was that there

242 Figure 3

A

| Patient | Gender | Age | Braak Score | Diagnosis    |
|---------|--------|-----|-------------|--------------|
| 1       | male   | 70  | 0           | Not Impaired |
| 2       | male   | 80  | 2           | Not Impaired |
| 3       | female | 91  | 3           | Not Impaired |
| 4       | male   | 74  | 5           | AD           |

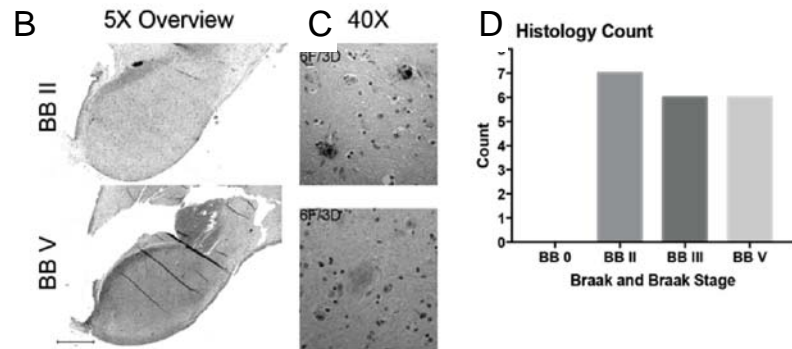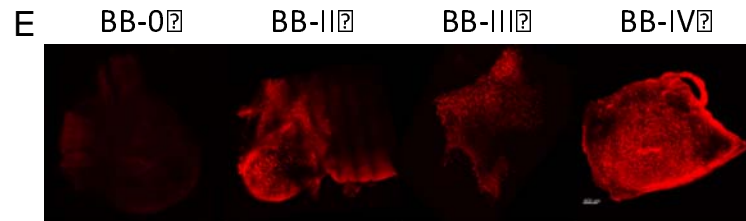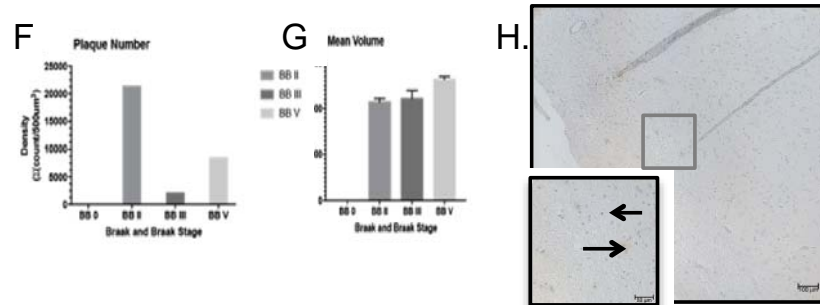

**Figure 3: Human mammillary body and associated white matter show AD-related amyloid burden.** A) Information on the patient samples used for the experiments in this figure. B) Representative images of 5X tile scans showing the overall MB structure and C) representative high-magnification image of the plaque types used for quantification (right). D) Quantification of histologically identified plaques from pathology slide sections. E) Representative images of the large-volume MB samples labeled with D54D2. F) The plaque count does not reflect the severity of the disease, however the G) mean plaque volumes increase with disease severity in this small cohort. H) White matter tracts identified anatomically and pathologically by presence of oligodendrocyte nuclei show amyloid burden too.

243 were numerous A $\beta$  deposits in oligodendrocyte-rich regions of the MB (Figure 3H), suggesting a  
244 relationship between white matter tracts and A $\beta$  deposition in this region.

245  
246 To check whether this is reflected in the 5XFAD model, we investigated the A $\beta$  burden in major  
247 forebrain white matter tracts. We did not observe A $\beta$  in the white matter of 2M animals, but did  
248 observe consistent deposits in the fornix of the 6M cohort (Figure 4A, Video 2c). The fornix,  
249 which connects the SUB to the SEPT and MB, is the major output structure of the hippocampal  
250 formation. To determine whether this burden was unique to the fornix, we took 100um coronal  
251 sections from 6M 5XFAD brains (Figure 4B). Surprisingly, white matter tracts connecting major  
252 limbic structures showed significantly more accumulation than tracts connecting other regions  
253 (Figure 4C, Friedman Test,  $Q = 40.29$ ,  $p < .0001$ ), suggesting that the limbic white matter is  
254 uniquely vulnerable. To determine whether these aggregates formed along the outside  
255 fasciculated bundles, we performed higher-magnification imaging of the 100um sections (Figure  
256 4D, Video 4). Interestingly, the 3D reconstruction demonstrates amyloid build-up within the  
257 myelin sheath, along the axonal path (Figure 4D, Z-plane). This pattern was specific to the  
258 limbic structures like the fornix, fimbria, and cingulum bundle (Figure 4E), excluded white matter  
259 tracts like the corpus callosum (Figure 4E) and was not present in the wild-type littermate  
260 control animals (Figure 4F). This data is particularly intriguing because in the 6M FAD there is  
261 considerable A $\beta$  burden in the cortical regions connected by the corpus callosum (Figure 1D).  
262 Together, it suggests that limbic white matter tracts are uniquely affected by axonal A $\beta$  in AD,  
263 and may explain structural alterations in these regions in human MRI<sup>21</sup> and the progression of  
264 connectivity impairments in individuals at risk or harboring significant brain A $\beta$ .<sup>48-50</sup>

## 265 266 **Discussion**

267 Using optimized SWITCH whole-brain clearing and immunolabeling technologies, we have  
268 created a spatially unbiased map of the progression of A $\beta$  deposits that revealed novel  
269 subcortical hubs of early-disease susceptibility in a mouse model of AD. Our findings  
270 demonstrate that areas connected by the fornix develop aggregates at the earliest phases of  
271 disease and that, of the identified vulnerable regions, the MB shows the most significant density  
272 of deposits across time. Although the MB is a critical part of the Papez long-term memory circuit  
273 connecting the hippocampus to the anterior thalamus,<sup>34,51</sup> it has not been strongly implicated in  
274 AD.<sup>34,42,52,53</sup> This is somewhat surprising because its major inputs, the subiculum and prefrontal  
275 cortex<sup>54</sup>, have been shown to demonstrate significant synaptic loss that correlates with memory  
276 performance.<sup>55-58</sup> Furthermore, the MB is part of the head-direction system, a group of critical

277 navigation regions including hippocampus, thalamus, and retrosplenial cortex that are affected  
278 in AD, and the pathology in which is thought to underlie spatial memory deficits seen in the  
279 disease.<sup>59,60</sup> Integrating our findings into this framework, the present data indicate that the  
280 subcortical and diencephalic projecting components of the Papez circuit are particularly  
281 vulnerable in AD. Interestingly, some of the regions of the Papez circuit and head direction  
282 systems, like the septum, were initially implicated in early AD by the cholinergic hypothesis,  
283 which posited that loss of those neurons was causative in disease onset and progression<sup>61</sup>.  
284 Although the idea was overshadowed by the amyloid cascade hypothesis,<sup>2</sup> our data, along with  
285 other recent evidence for Papez circuit dysfunction<sup>50</sup> suggests that these subcortical structures  
286 and their white matter tracts are associated with amyloid pathology early in AD.<sup>62</sup> In the present  
287 manuscript, we take this observation one step further to show that the onset of A $\beta$  aggregation  
288 in the MB of the 5XFAD animals correlates with functional alterations. These data are consistent  
289 with network-level changes previously observed in the Papez circuit in AD patients and other  
290 amyloid models,<sup>9,22,36,40</sup> and the significant findings at such an early pathological stage highlight  
291 the importance of continued investigation of the network alterations and functional changes in  
292 these structures at the initial disease phases. Because the regions in the basal forebrain are  
293 linked in our data, and other studies, to the hypothalamic diencephalic limbic structures, we  
294 suggest in-depth studies of these regions and their connections may lead to a better  
295 understanding of the mechanisms of dysfunction underlying AD onset and the ensuing  
296 progressive memory loss.

297  
298 It has become increasingly important to understand the translatability of observations in animal  
299 models to human disease.<sup>63,64</sup> Thus to determine whether the MB is also affected early in  
300 human AD, we used SWITCH techniques to confirm that A $\beta$  aggregates are present in  
301 postmortem MB from Braak staged individuals with tau pathology and an AD patient. Our data  
302 investigating both traditional histology sections alongside large-volume labeled samples show  
303 significant A $\beta$  burden that increases with stage, which is most evident using our novel  
304 technique. The data we obtained with traditional labeling methods was consistent with the  
305 literature<sup>65</sup>, however the large-volume images revealed that the histology sections did not show  
306 the full burden in the region. This observation highlights the power of these tools to enable a  
307 better understanding of pathological affliction through molecular interrogations of intact,  
308 precious samples. These observations of MB lesion and dysfunction in AD are of particular note  
309 because of the amnesia associated with other MB-related conditions. For example in  
310 Wernicke's encephalopathy and Korsakoff's syndrome, MB structural alterations were one of

311 Figure 4  
312

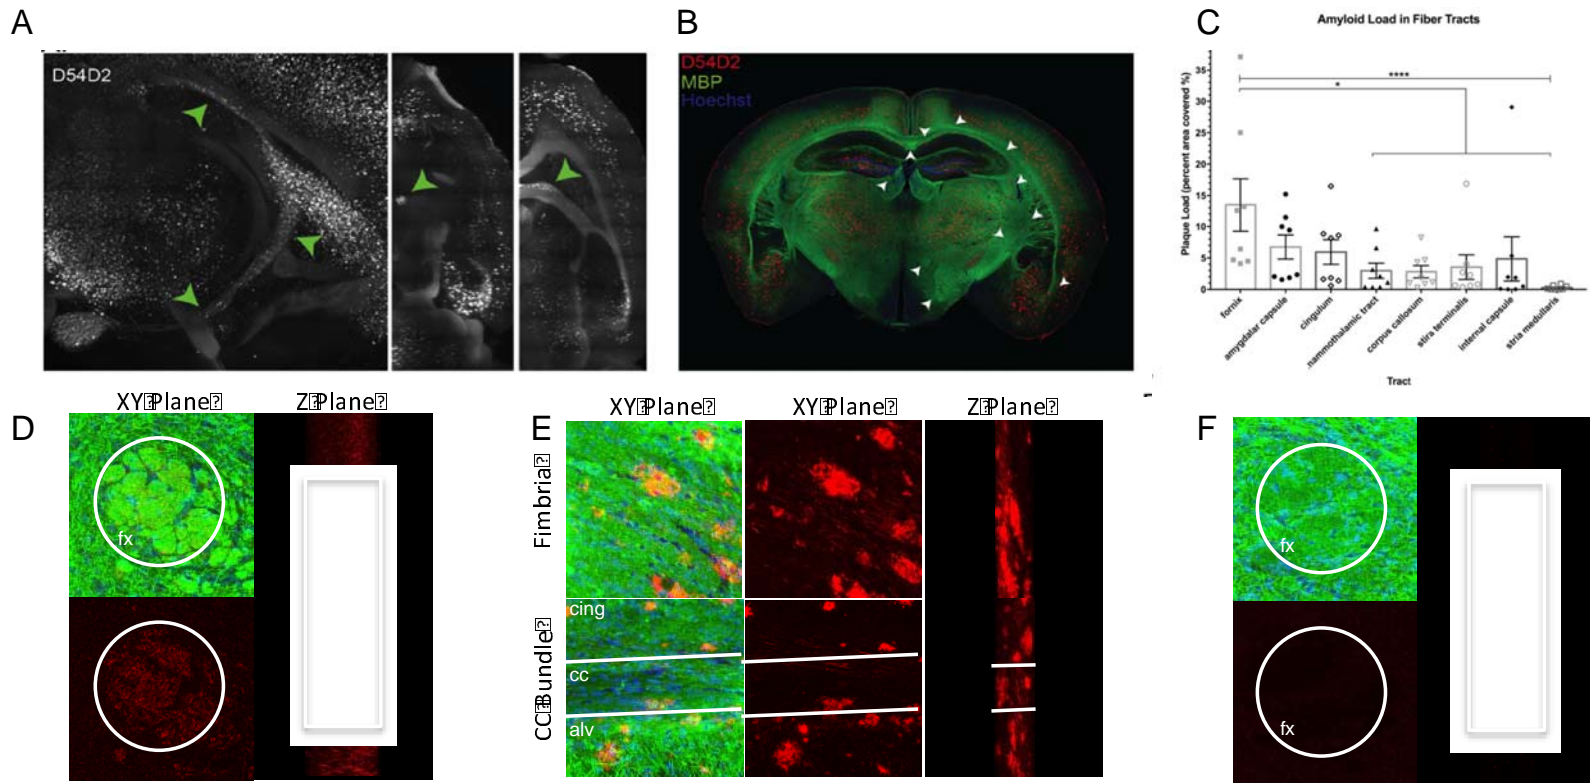

**Figure 4: White matter amyloid deposits are specific to limbic tracts.** Six-month 5XFAD animals develop amyloid deposits within the white matter. (A) Representative images of amyloid within the fornix visualized in the 3D rendered whole brain amyloid labeling in the six-month 5XFAD cohort. (B) Representative image of the white matter amyloid labeling in 100um sections from a second cohort of six-month 5XFAD animals. (C) Quantification of white matter deposits within several posterior white matter tracts. (D) Representative images demonstrating labeling of amyloid within white matter bundles in the fornix. (E) Representative images showing robust amyloid deposition within the fimbria, cingulum, and alveus, and less in the corpus callosum. (F) There is no amyloid labeling within the fornix of non-transgenic 6-month aged littermates. \* $p < 0.05$ ; \*\*\* $p < 0.0001$ ; Green and white arrows point to white matter regions with observed amyloid. Graphs report Mean  $\pm$  Standard Deviation. Abbreviations: fx, fornix; cing, cingulum bundle; cc, corpus callosum; alv, alveus.

Canter, Choi, et al: 3D Mapping of network-specific

313 the first anatomical abnormalities correlated with worsened memory performance.<sup>66–68</sup> More  
314 recent studies utilizing functional readouts and dietary interventions suggest that while the MB  
315 may be a primary site of sensitivity, thalamic, hippocampal, and cortical alterations also coincide  
316 with worsening memory.<sup>67,69,70</sup> Interestingly, the interventions restore hippocampal connectivity  
317 to the diencephalic mammillary body and thalamus<sup>69,70</sup>, which are strikingly similar results to the  
318 experimental trials using deep brain stimulation of the fornix near the MB to enhance memory in  
319 AD patients.<sup>71</sup> Together, this data suggest that dysfunction within the MB correlates with HPC  
320 abnormalities and memory impairment, like those seen in AD. Importantly, recent human  
321 studies correlating MB abnormalities to memory performance specifically link MB aberrations to  
322 impaired recall memory,<sup>38,70</sup> the type of memory thought to be most affected in AD.<sup>72,73</sup>

323  
324 In addition to a better understanding of the regions that show primary A $\beta$  aggregation and  
325 promote the initial network destabilization, our data suggest mechanisms for A $\beta$  propagation  
326 between connected brain regions.<sup>74</sup> By demonstrating enhanced A $\beta$  deposition within limbic  
327 white matter tracts, and unique axonal patterns of A $\beta$  within the Papez and limbic circuit tract,  
328 we propose that specific disconnection of the core memory network underlies cognitive  
329 impairment in AD. This may be due to particular mechanisms of A $\beta$  handling within primary  
330 neurons of the memory network, or the particular vulnerability of the cells to overproduction or  
331 mishandling of APP/ A $\beta$ . Additionally, by showing that distinct networks are burdened by A $\beta$ ,  
332 with increasingly complex networks affected across age, we present a unifying view of early  
333 lesions and can provide a framework in which to better interpret human pathogenesis.  
334 Investigators have suggested that the DMN, limbic system, attentional systems, and brain stem  
335 may all be involved at the earliest stages of prodromal AD. The data presented in this  
336 manuscript suggest that these do not need to be disparate hypotheses, but instead represent  
337 different stages of network affliction that occur as the disease progresses. In the mouse model,  
338 2M 5XFAD animals show core limbic affliction, followed by the DMN at 4M and typical limbic  
339 system at 6M. These observations suggest that early AD may be best staged by the network  
340 aberrations detected by functional MRI techniques. These alterations occur before overt  
341 memory loss,<sup>33</sup> and with increasing evidence for restoration of network function as a successful  
342 treatment in AD models,<sup>9,72,75</sup> our data may lay the ground work for network-progression staging  
343 to guide early-disease circuit interventions.

344  
345  
346

347 **Methods**

348 **Animals**

349 All mouse work was approved by the Committee for Animal Care of the Division of Comparative  
350 Medicine at the Massachusetts Institute of Technology. 5XFAD (Tg 6799) breeding pairs were  
351 acquired from the Mutant Mouse Resource and Research Center (MMRRC) (Stock No. 034848-  
352 JAX) and maintained as hemizygous on the BL6 background. Animals were group housed on a  
353 12h light/dark cycle with Nestlet enrichment and sacrificed at the ages noted in the text.

354

355 **Mouse Tissue Fixation**

356 Mice were deeply anesthetized with isoflurane (Isoflurane, USP, Piramal Healthcare, Andhra  
357 Pradesh, India) and underwent transcatheter perfusion with ice cold 1X PBS (10X stock, Gibco,  
358 #70011-044) followed by ice-cold fixative made of 4% paraformaldehyde (32% stock, Electron  
359 Microscopy Sciences (EMS), Hatfield, PA, #15714) and 1% glutaraldehyde (10% stock, EMS  
360 #16110) in 1X PBS. Brains were removed from the skull and post-fixed in the same fixative for 3  
361 days shaking at 4C.

362

363 **Whole Mouse Brain Processing**

364 After washing in 1X PBS, brains incubated in inactivation solution of 1% acrylamide (40% stock,  
365 Biorad #161-0140), 1M glycine (Sigma-Aldrich, St. Louis, MO, #G7126) in 1X PBS. After  
366 washing in 1X PBS, brains were put into clearing solution of 200mM sodium dodecyl sulfate  
367 (SDS) (Sigma-Aldrich, #L3771), 20mM lithium hydroxide monohydrate (Sigma, #254274),  
368 40mM boric acid (Sigma-Aldrich, #7901), pH 8.5-9.0 and left shaking at 55C for 4 weeks until  
369 white matter tracts were translucent to the eye in SDS. Brains were washed in 1X PBS or Weak  
370 Binding Solution (WBS) for up to 1 week and immunolabeled with the SWITCH protocol for  
371 labeling intact mouse brain (Supplemental Protocol 1).

372

373 **Mouse Brain Section Processing**

374 Where sections were analyzed, brains were sliced to 100um on a vibratome (Leica VT100S)  
375 and stored at 4C in 1X PBS + 0.02% sodium azide (Sigma-Aldrich, #S2002). For SWITCH  
376 labeling, individual sections were incubated in clearing solution shaking at 55C for 2 hours and  
377 were washed in 1X PBS. Sections were immunolabeled with the SWITCH protocol for labeling  
378 mouse brain sections (Supplemental Protocol 2).

379

380 **Human Tissue Processing**

## Canter, Choi, et al: 3D Mapping of network-specific

381 Human tissue blocks were deparaffinized by sequential immersion in xylene, ethanol, and water  
382 (details in Human SWITCH protocol). Then, blocks were incubated in 1% GA in 1X PBS for 10  
383 days at 4C. Brains were incubated in clearing solution shaking at 55C until the tissue appeared  
384 translucent (4-8 weeks). Following clearing, tissue was labeled using the SWITCH protocol for  
385 labeling human autopsy specimens (Supplemental Protocol 3).

386

### 387 Antibodies & Dyes

388 The primary antibodies used are as follows:

| Target                       | Host   | Company                     | Product # | Dilution    |
|------------------------------|--------|-----------------------------|-----------|-------------|
| A $\beta$ (D54D2)            | Rabbit | Cell Signaling Technologies | 8243      | 1:100 –1000 |
| Myelin Basic Protein* SMI-99 | Mouse  | BioLegend                   | 808401    | 1:50 –500   |
| Myelin Basic Protein* SMI-94 | Mouse  | BioLegend                   | 836502    | 1:50 –500   |

389 \*These antibodies were used concurrently as per the manufacturer's recommendation.

390

### 391 *Additional labeling reagents:*

392 Hoechst 33528 was used for nuclear labeling (Sigma #14530).

393 All secondary antibodies were Pre-adsorbed F(ab)<sub>2</sub>' AlexaFluor-conjugated from AbCam.

394

### 395 Whole Brain Image Acquisition

396 Whole brain images were acquired on a custom SPIM microscope built by H.C. During imaging,  
397 samples were illuminated with a sheet of light generated by scanning a focused beam from a  
398 light from a broad spectrum laser unit (SOLE -6 with 405, 488, 561, 647 nm, Omicron) through a  
399 low NA objective (Macro 4X/ 0.28 NA, Olympus) with a galvo-scanner (6215H, Cambridge  
400 Technology). Collection of emitted light on the microscope occurs through a long working  
401 distance high NA objective (10x/0.6 NA WD 8mm CLARITY, Olympus). The microscope is  
402 outfitted with four sCMOS cameras (Orca Flash4.0 V2, Hamamatsu) for simultaneous  
403 multichannel detection and signal recording. During acquisition, the samples were illuminated  
404 simultaneously from dual illumination arms (one on each side) to minimize the shading effects of  
405 light scattering elements in the brain. Dynamic confocal mode of detection is implemented by  
406 synchronizing the scanning speed of the illumination beam with the read-out speed of the rolling  
407 shutter mode of sCMOS camera, which improves the signal to background ratio by filtering out



408 background noise from out-of-focal planes. Sample is mounted on a motorized stage with x, y, z  
409 translation and theta rotation (M-112.2DG, M-111K028, M-116.DG, Physik Instrumente) for  
410 mosaic imaging. Z-stack imaging by sample scanning alone is slow due to communication  
411 overhead between the host computer and the stage controller. We achieved high-speed volume  
412 imaging by scanning the light sheet along the depth direction with a galvo-scanner and  
413 synchronizing the position of the light sheet with the detection objective's focal plane by moving  
414 the detection objective with a piezo actuator (P-628.1CL, Physik Instrumente). To maintain light  
415 sheet position on the focal plane of the objective across the entire sample volume, we  
416 implemented an image based autofocus algorithm.<sup>76</sup> The laser settings are determined such  
417 that about 5% of the images are saturated to its maximum gray level for high signal to  
418 background ratio. The sample chamber is filled with the refractive index matching solution  
419 (RIMS)<sup>77</sup>. Depending on the refractive index of the medium, the beam waist position of the  
420 illumination light sheet shifts along the illumination beam direction. Each illumination objective is  
421 mounted on the piezo actuator (P-628.1CL, Physik Instrumente) to allow the beam waist  
422 position to be adjusted to the center of the detection objective. Sample chamber is specially  
423 designed to allow for free motion of the detection objective while preventing leakage of the  
424 immersion medium.

425

#### 426 Whole Brain Image Processing

427 Each tile is first corrected for the non-uniform illumination pattern using a modified algorithm  
428 from Smith and colleagues<sup>78</sup>. Multiple stacks of acquired images are stitched with TeraStitcher.<sup>79</sup>  
429 Each tile has 15% overlapping area with the neighboring tiles for calculating stitching  
430 parameters. The voxel size of raw data is 0.58 x 0.58 x 5.0um. After stitching, the data set is  
431 down-sampled in X and Y dimension for further analysis with Imaris software (Bitplane).

432

#### 433 Section Image Acquisition

434 For section and human tissue imaging, tissue was mounted onto microscope slides (VWR  
435 VistaVision, VWR International, LLC, Radnor, PA) with either Fluoromount G Mounting Medium  
436 (Electron Microscopy Sciences, Hatfield, PA, USA) or RIMS solution<sup>77</sup>.

437

438 Slice images were acquired on a Zeiss LSM Inverted 710 microscope using Zen 2012 software  
439 (Carl Zeiss Microscopy, Jena, Germany). Images with cellular resolution were taken using a C-  
440 apochromat 40X, water immersion objective, NA 1.20. Section overview images used a Plan-  
441 apochromat 5X, air objective, NA 0.16. Pinhole, optical sectioning, and laser settings were

442 determined for each experiment and kept consistent for all images within an experiment or that  
443 were included within one graph.

444

#### 445 Human Brain Image Acquisition

446 Human brain images were acquired on a Leica TCS SP8 Confocal Microscope using LASAF  
447 software (Leica Microsystems, Wetzlar, Germany). Images were taken using a 20X 1.0NA  
448 CLARITY optimized objective with 6mm working distance. The pinhole, optical sectioning, and  
449 resolution and laser settings were empirically determined for one brain, and kept constant for  
450 imaging subsequent samples.

451

#### 452 3D Image Quantification

453 Images were analyzed using Imaris (Bitplane, Zurich, Switzerland). All quantification steps were  
454 performed on raw images by blinded investigators. For whole brain analyses (Figure 1), each  
455 whole brain file was segmented by hand using white matter tract and regional guidelines from  
456 the Allen Brain Atlas (Allen Mouse Brain Atlas, Coronal) to delineate boundaries for each major  
457 brain region (Video 5). After segmentation, a spots object was created on a 12 month brain. The  
458 parameters were fixed over the entire brain, and spots were separated into the bounded brain  
459 regions using the Spots into Surfaces tool in Imaris Xtensions. A spots object was created on  
460 each brain and these objects were similarly split into brain regions using the Xtension. Data was  
461 exported to CSV and analyzed GraphPad Prism 7.0a for Mac. For human brain analyses  
462 (Figure 3), the 3D rendering was randomly segmented into five, 0.5mm<sup>3</sup> sub-sections to account  
463 for differences in block size. An identical spots object was created within each of the five sub-  
464 sections, and the data was exported to CSV and analyzed GraphPad Prism 7.0a for Mac.

465

#### 466 2D Image Quantification

467 For 2D analyses, images were imported into FIJI<sup>80</sup> as TIFF files. Relevant values were exported  
468 to GraphPad for statistical analyses. For human amyloid analyses (Figure 3), two blinded  
469 observers counted plaques within images using the Multi-point tool. Data was saved as a CSV  
470 and analyzed in GraphPad Prism 7.0a for Mac. For white matter quantification (Figure 4),  
471 blinded observers analyzing only the myelin image channel of a 5X section-overview image  
472 segmented white matter tracts. Then the segmentation was overlaid on the A $\beta$  channel as a  
473 selection, within which a threshold was applied to the images. Finally, the Analyze Particles tool  
474 was used to count individual deposits. Data was saved in a spreadsheet and analyzed in  
475 GraphPad Prism 7.0a for Mac.

Canter, Choi, et al: 3D Mapping of network-specific

476 Representative Images and Videos from Whole Brain Data

477 Representative images from the whole-brain datasets are either 2D images of the 3D rendered  
478 whole dataset or digitally sectioned at 5-100um in Imaris using the Orthoslicer tool. Videos are  
479 created using the Key Frame Animation tool in Imaris. The brightness of the images has been  
480 individually adjusted for each brain to enhance 2D/3D viewing of specific objects. Because of  
481 these alterations, no direct comparisons of labeling intensity should be made between images.

482

483 In situ hybridization probe design

484 RNA antisense probes were generated by PCR-amplifying human cDNA with human-specific  
485 *APP* primers with a T7 RNA polymerase recognition sequence (TAATACGACTCACTATAGGG)  
486 fused to the reverse primer (Table 1). The resulting PCR product was gel extracted and *in vitro*  
487 transcribed using a DIG-RNA labeling kit (Roche).

488

489 Immuno-in situ hybridization (Immuno-ISH)

490 Mice were anesthetized by isoflurane in an open system and perfused with RNase-free PBS  
491 followed by RNase-free 4% formaldehyde. Brains were dissected, drop fixed in RNase-free 4%  
492 formaldehyde for 12 hours, equilibrated in 30% sucrose-PBS, and frozen in O.C.T. (TissueTek).  
493 Cryosections (10µm) were incubated with a DIG-labeled RNA antisense probe (1:1000 in  
494 hybridization buffer) overnight at 65°C, washed in 1X SSC/50% formamide/0.1% Tween-20 3X  
495 30 minutes at 65°C followed by 1X MABT for 30 minutes at room temperature. Sections were  
496 blocked with 20% heat-inactivated sheep serum/2% blocking reagent (Roche)/1X MABT for 1  
497 hour and then incubated with mouse anti-DIG antibody (Roche; 1:2000) and rabbit anti-amyloid  
498 β (Cell Signaling; 1:500) diluted in blocking solution overnight. Sections were washed with  
499 1XMABT 2X 20 minutes, incubated with donkey anti-rabbit Alexa-488 (Invitrogen; 1:1000)  
500 diluted in blocking solution for 1 hour, and washed with 1XMABT 5X 20 minutes. Sections were  
501 then prestained with 100mM NaCl/50mM MgCl<sub>2</sub>/100mM Tris pH 9.5/0.1% Tween-20 2X 10  
502 minutes, followed by staining with NBT/BCIP (Roche; 4.5 µl/ml and 3.5 µl/ml, respectively, in  
503 prestaining buffer) for 2 hours. Sections were washed with 1X PBS 3X 15 minutes, incubated in  
504 xylene 3X 5 minutes, and mounted with VectaMount (Vector Laboratories).

505

| Gene | Forward Primer  | Reverse Primer                   |
|------|-----------------|----------------------------------|
| hAPP | GAGACACCTGGGGAT | TAATACGACTCACTATAGGGACAGAGTCAGCC |
|      | GAGAA           | CCAAAAGA                         |

506 Table 1. Primer sequences (5'-3') for *in situ* probe preparation.

507 Ex vivo electrophysiology

508 Acute hippocampal slices were prepared from C57bl/6 mice aged 2-2.5 months old, which are  
509 wild type group and 5xFAD group. The mice were anesthetized with isoflurane and decapitated.  
510 The experimenter was blinded to the group of animal. Transverse brain slices (250  $\mu$ m thick)  
511 were prepared in ice-cold dissection buffer (in mM: 211 sucrose, 3.3 KCl, 1.3 NaH<sub>2</sub>PO<sub>4</sub>, 0.5  
512 CaCl<sub>2</sub>, 10 MgCl<sub>2</sub>, 26 NaHCO<sub>3</sub> and 11 glucose) using a Leica VT1000S vibratome (Leica).  
513 Slices were recovered in a submerged chamber with 95% O<sub>2</sub>/5% CO<sub>2</sub>-saturated artificial  
514 cerebrospinal fluid (ACSF) consisting of (in mM) 124 NaCl, 3.3 KCl, 1.3 NaH<sub>2</sub>PO<sub>4</sub>, 2.5 CaCl<sub>2</sub>,  
515 1.5 MgCl<sub>2</sub>, 26 NaHCO<sub>3</sub> and 11 glucose for 1 h at 28–30 °C. Whole cell patch clamp with  
516 current steps from 0 pA to +130 pA at 10 pA increments for 800ms were used to verify the  
517 ability to form action potential (AP) on HEKA ECP 10 Amplifier (Germany) with Pulse software.  
518 Number of APs at each current step; Resting membrane potential (RMP); Threshold of APs;  
519 Amplitude of APs from RMP and threshold as well as fast afterhyperpolarization (fAHP) were  
520 measured and analyzed.

521 Statistics

522 All statistics were performed in MatLab or GraphPad Prism. Individual statistical tests are  
523 indicated in the text and/or figure legends for the appropriate experiments. Graphs were created  
524 in the respective analytical software packages and exported as .TIFF, .PDF, or .JPEG for  
525 inclusion in the document.

526

527 Acknowledgements

528 The authors would like to acknowledge Michiel Kooreman at the Netherlands Brain Bank for  
529 help procuring the PPFE human tissue and Teresa Lima for her expert advice in preparing the  
530 human PPFE brain tissue for the optimized CLARITY protocol. We would also like to thank Nina  
531 Dedic for her advice and helpful comments on the project and manuscript. Additionally, we  
532 would like to acknowledge Naveed Bakh, Sung-Yon Kim, and Kamilla Tekiela for helping lay the  
533 groundwork for the experiments presented in this work.

534

535 Funding

536 This work was funded by NIH grant RF1AG047661 to L.-H.T. and by the Norman B. Leventhal  
537 and Barbara Weedon fellowships to R.G.C. Additionally, K.C. was supported by Burroughs  
538 Wellcome Fund Career Awards at the Scientific Interface, the Searle Scholars Program,

Canter, Choi, et al: 3D Mapping of network-specific

539 Packard award in Science and Engineering, NARSAD Young Investigator Award, JPB  
540 Foundation (PIIF and PNDRF), NCSOFT Cultural Foundation, and NIH (1-U01-NS090473-01).  
541  
542 Resources that may help enable general users to establish the methodology are freely available  
543 online (<http://www.chunglabresources.org>).

544

545 **Citations**

- 546 1. Hurd, M. D., Martorell, P., Delavande, A., Mullen, K. J. & Langa, K. M. Monetary costs of  
547 dementia in the United States. *N. Engl. J. Med.* **368**, 1326–34 (2013).
- 548 2. Hardy, J. & Higgins, G. Alzheimer's Disease □: The Amyloid Cascade Hypothesis.  
549 *Science (80-. )*. **256**, 184–185 (1992).
- 550 3. Musiek, E. S. & Holtzman, D. M. Three dimensions of the amyloid hypothesis □: time ,  
551 space and ' wingmen '. *Nat. Neurosci.* **18**, (2015).
- 552 4. Mutations | AlzForum. Available at: <http://www.alzforum.org/mutations/>. (Accessed: 20th  
553 October 2016)
- 554 5. Hong, S. *et al.* Complement and microglia mediate early synapse loss in Alzheimer  
555 mouse models. *Science (80-. )*. **337**, 1–9 (2016).
- 556 6. Wei, W. *et al.* Amyloid beta from axons and dendrites reduces local spine number and  
557 plasticity. *Nat. Neurosci.* **13**, 190–196 (2009).
- 558 7. Scheuner, D. *et al.* Secreted amyloid beta-protein similar to that in the senile plaques of  
559 Alzheimer's disease is increased in vivo by the presenilin 1 and 2 and APP mutations  
560 linked to familial Alzheimer's disease. *Nat. Med.* **2**, 864–870 (1996).
- 561 8. Kimura, R. & Ohno, M. Impairments in remote memory stabilization precede hippocampal  
562 synaptic and cognitive failures in 5XFAD Alzheimer mouse model. *Neurobiol. Dis.* **33**,  
563 229–235 (2009).
- 564 9. Palop, J. J. *et al.* Aberrant Excitatory Neuronal Activity and Compensatory Remodeling of  
565 Inhibitory Hippocampal Circuits in Mouse Models of Alzheimer's Disease. *Neuron* **55**,  
566 697–711 (2007).
- 567 10. Huijbers, W. *et al.* Amyloid-beta deposition in mild cognitive impairment is associated with  
568 increased hippocampal activity, atrophy and clinical progression. *Brain* **138**, 1023–1035  
569 (2015).
- 570 11. Thal, D. R., Rüb, U., Orantes, M. & Braak, H. Phases of A beta-deposition in the human  
571 brain and its relevance for the development of AD. *Neurology* **58**, 1791–1800 (2002).
- 572 12. Mormino, E. C. *et al.* Synergistic effect of  $\beta$ -amyloid and neurodegeneration on cognitive  
573 decline in clinically normal individuals. *JAMA Neurol.* **71**, 1379–85 (2014).
- 574 13. Jack, C. R. *et al.* Brain beta-amyloid measures and magnetic resonance imaging atrophy  
575 both predict time-to-progression from mild cognitive impairment to Alzheimer's disease.  
576 *Brain* **133**, 3336–3348 (2010).
- 577 14. Buckner, R. L., Andrews-Hanna, J. R. & Schacter, D. L. The brain's default network:  
578 Anatomy, function, and relevance to disease. *Ann. N. Y. Acad. Sci.* **1124**, 1–38 (2008).
- 579 15. Villemagne, V. L. *et al.* Amyloid Imaging with 18F-Florbetaben in Alzheimer Disease and  
580 Other Dementias. *J. Nucl. Med.* **52**, 1210–1217 (2011).
- 581 16. Klunk, W. E. *et al.* Imaging brain amyloid in Alzheimer's disease with Pittsburgh  
582 Compound-B. *Ann. Neurol.* **55**, 306–319 (2004).
- 583 17. Villemagne, V. L. *et al.* Longitudinal assessment of Abeta and cognition in aging and  
584 Alzheimer disease. *Ann. Neurol.* **69**, 181–192 (2011).
- 585 18. Jack, C. R. *et al.* Rates of beta-amyloid accumulation are independent of hippocampal  
586 neurodegeneration. *Neurology* **82**, 1605–1612 (2014).

Canter, Choi, et al: 3D Mapping of network-specific

- 587 19. Greicius, M. D., Srivastava, G., Reiss, A. L. & Menon, V. Default-mode network activity  
588 distinguishes Alzheimer's disease from healthy aging: evidence from functional MRI.  
589 *Proc. Natl. Acad. Sci. U. S. A.* **101**, 4637–42 (2004).
- 590 20. Fletcher, E. *et al.* Beta-amyloid, hippocampal atrophy and their relation to longitudinal  
591 brain change in cognitively normal individuals. *Neurobiol. Aging* **40**, 173–180 (2016).
- 592 21. Fletcher, E., Carmichael, O., Pasternak, O., Maier-Hein, K. H. & DeCarli, C. Early Brain  
593 Loss in Circuits Affected by Alzheimer's Disease is Predicted by Fornix Microstructure but  
594 may be Independent of Gray Matter. *Front. Aging Neurosci.* **6**, 106 (2014).
- 595 22. Bakker, A., Albert, M. S., Krauss, G., Speck, C. L. & Gallagher, M. Response of the  
596 medial temporal lobe network in amnesic mild cognitive impairment to therapeutic  
597 intervention assessed by fMRI and memory task performance. *NeuroImage Clin.* **7**, 688–  
598 698 (2015).
- 599 23. Reitz, C. & Mayeux, R. Alzheimer disease: Epidemiology, diagnostic criteria, risk factors  
600 and biomarkers. *Biochem. Pharmacol.* **88**, 640–651 (2014).
- 601 24. De Strooper, B. & Karran, E. The Cellular Phase of Alzheimer's Disease. *Cell* **164**, 603–  
602 615 (2016).
- 603 25. Oakley, H. *et al.* Intraneuronal  $\beta$ -Amyloid Aggregates, Neurodegeneration, and Neuron  
604 Loss in Transgenic Mice with Five Familial Alzheimer's Disease Mutations: Potential  
605 Factors in Amyloid Plaque Formation. *J. Neurosci.* **26**, 10129–10140 (2006).
- 606 26. Murray, E. *et al.* Simple, Scalable Proteomic Imaging for High-Dimensional Profiling of  
607 Intact Systems. *Cell* **163**, 1500–1514 (2015).
- 608 27. Barnes, A. The specificity of pH and ionic strength effects on the kinetics of the Rh (D)-  
609 anti-Rh (D) system. *J. Immunol.* **96**, 854–864 (1966).
- 610 28. Eimer, W. A. & Vassar, R. Neuron loss in the 5XFAD mouse model of Alzheimer's  
611 disease correlates with intraneuronal A $\beta$ 42 accumulation and Caspase-3 activation. *Mol.*  
612 *Neurodegener.* **8**, 2 (2013).
- 613 29. Richardson, D. S. & Lichtman, J. W. Clarifying Tissue Clearing. *Cell* **162**, 246–257  
614 (2015).
- 615 30. Jost, B. C. & Grossberg, G. T. The evolution of psychiatric symptoms in Alzheimer's  
616 disease: A natural history study. *J. Am. Geriatr. Soc.* **44**, 1078–1081 (1996).
- 617 31. Stafford, J. M. *et al.* Large-scale topology and the default mode network in the mouse  
618 connectome. *Proc. Natl. Acad. Sci. U. S. A.* **111**, 18745–50 (2014).
- 619 32. Hedden, T. *et al.* Disruption of functional connectivity in clinically normal older adults  
620 harboring amyloid burden. *J Neurosci* **29**, 12686–12694 (2009).
- 621 33. Sperling, R., LaViolette, P. & O'Keefe, K. Amyloid deposition is associated with impaired  
622 default network function in older persons without dementia. *Neuron* **63**, 178–188 (2009).
- 623 34. Aggleton, J. P., Pralus, A., Nelson, A. J. D. & Hornberger, M. Thalamic pathology and  
624 memory loss in early Alzheimer's disease: moving the focus from the medial temporal  
625 lobe to Papez circuit. *Brain* aww083 (2016). doi:10.1093/brain/aww083
- 626 35. Siskova, Z. *et al.* Dendritic structural degeneration is functionally linked to cellular  
627 hyperexcitability in a mouse model of alzheimer's disease. *Neuron* **84**, 1023–1033  
628 (2014).
- 629 36. Vossel, K. A. *et al.* Seizures and epileptiform activity in the early stages of Alzheimer  
630 disease. *JAMA Neurol.* **70**, 1158–66 (2013).
- 631 37. Dillingham, C. M., Frizzati, A., Nelson, A. J. D. & Vann, S. D. How do mammillary body  
632 inputs contribute to anterior thalamic function? *Neurosci. Biobehav. Rev.* **54**, 108–119  
633 (2015).
- 634 38. Tsivilis, D. *et al.* A disproportionate role for the fornix and mammillary bodies in recall  
635 versus recognition memory. *Nat. Neurosci.* **11**, 834–842 (2008).
- 636 39. Llinás, R. R. & Alonso, A. Electrophysiology of the mammillary complex in vitro. II. Medial  
637 mammillary neurons. *J. Neurophysiol.* **68**, 1321–31 (1992).

Canter, Choi, et al: 3D Mapping of network-specific

- 638 40. Verret, L. *et al.* Inhibitory interneuron deficit links altered network activity and cognitive  
639 dysfunction in alzheimer model. *Cell* **149**, 708–721 (2012).
- 640 41. Vann, S. D. & Nelson, A. J. D. in *Progress in Brain Research* **219**, 163–185 (2015).
- 641 42. Copenhaver, B. R. *et al.* The fornix and mammillary bodies in older adults with  
642 Alzheimer's disease, mild cognitive impairment, and cognitive complaints: A volumetric  
643 MRI study. *Psychiatry Res. - Neuroimaging* **147**, 93–103 (2006).
- 644 43. McDuff, T. & Sumi, S. M. Subcortical degeneration in Alzheimer's disease. *Neurology* **35**,  
645 123–126 (1985).
- 646 44. Callen, D. J. A., Black, S. E., Caldwell, C. B. & Grady, C. L. The influence of sex on limbic  
647 volume and perfusion in AD. *Neurobiol. Aging* **25**, 761–770 (2004).
- 648 45. Hornberger, M. *et al.* In vivo and post-mortem memory circuit integrity in frontotemporal  
649 dementia and Alzheimer's disease. *Brain* **135**, 3015–3025 (2012).
- 650 46. Nestor, P. J., Fryer, T. D., Smielewski, P. & Hodges, J. R. Limbic hypometabolism in  
651 Alzheimer's disease and mild cognitive impairment. *Ann. Neurol.* **54**, 343–351 (2003).
- 652 47. Braak, H. & Braak, E. Neuropathological staging of Alzheimer-related changes. *Acta*  
653 *Neuropathol.* **82**, 239–259 (1991).
- 654 48. Sheline, Y. I. *et al.* Amyloid Plaques Disrupt Resting State Default Mode Network  
655 Connectivity in Cognitively Normal Elderly. *Biol. Psychiatry* **67**, 584–587 (2010).
- 656 49. Lim, H. K. *et al.* Regional amyloid burden and intrinsic connectivity networks in cognitively  
657 normal elderly subjects. *Brain* **137**, 3327–3338 (2014).
- 658 50. Li, W. *et al.* Aberrant functional connectivity in Papez circuit correlates with memory  
659 performance in cognitively intact middle-aged APOE4 carriers. *Cortex* **57**, 167–176  
660 (2014).
- 661 51. Vann, S. D. Dismantling the papez circuit for memory in rats. *Elife* **2013**, 1–21 (2013).
- 662 52. Jucker, M. & Walker, L. C. Self-propagation of pathogenic protein aggregates in  
663 neurodegenerative diseases. *Nature* **501**, 45–51 (2013).
- 664 53. Avila, J., Perry, G., Strange, B. A. & Hernandez, F. Alternative neural circuitry that might  
665 be impaired in the development of Alzheimer disease. *Front. Neurosci.* **9**, 1–5 (2015).
- 666 54. Allen, G. V & Hopkins, D. a. Mammillary body in the rat: topography and synaptology of  
667 projections from the subicular complex, prefrontal cortex, and midbrain tegmentum. *J.*  
668 *Comp. Neurol.* **286**, 311–336 (1989).
- 669 55. Terry, R. D. *et al.* Physical basis of cognitive alterations in Alzheimer's disease: Synapse  
670 loss is the major correlate of cognitive impairment. *Ann. Neurol.* **30**, 572–580 (1991).
- 671 56. DeKosky, S. T. & Scheff, S. W. Synapse loss in frontal cortex biopsies in Alzheimer's  
672 disease: Correlation with cognitive severity. *Ann. Neurol.* **27**, 457–464 (1990).
- 673 57. Scheff, S. W. & Price, D. A. Synapse Loss in the Temporal Lobe in Alzheimer ' s Disease.  
674 *Ann. Neurol.* (1993).
- 675 58. Hyman, B. T., Van Hoesen, G. W., Damasio, A. R. & Barnes, C. L. Alzheimer's disease:  
676 cell-specific pathology isolates the hippocampal formation. *Science* **225**, 1168–70 (1984).
- 677 59. Yoder, R. M., Peck, J. R. & Taube, J. S. Visual landmark information gains control of the  
678 head direction signal at the lateral mammillary nuclei. *J. Neurosci.* **35**, 1354–67 (2015).
- 679 60. Sharp, P. E. & Koester, K. Lesions of the mammillary body region severely disrupt the  
680 cortical head direction, but not place cell signal. *Hippocampus* **18**, 766–784 (2008).
- 681 61. Whitehouse, P. J., Price, D. L., Clark, a W., Coyle, J. T. & DeLong, M. R. Alzheimer  
682 disease: evidence for selective loss of cholinergic neurons in the nucleus basalis. *Ann*  
683 *Neurol* **10**, 122–126 (1981).
- 684 62. Dean 3rd, D. *et al.* Association of Amyloid Pathology With Myelin Alteration in Preclinical  
685 Alzheimer Disease. *JAMA Neurol.* **Epub ahead**, (2016).
- 686 63. Hargis, K. E. & Blalock, E. M. Transcriptional signatures of brain aging and Alzheimer's  
687 disease: What are our rodent models telling us? *Behavioural Brain Research* (2016).  
688 doi:10.1016/j.bbr.2016.05.007

Canter, Choi, et al: 3D Mapping of network-specific

- 689 64. Sabbagh, J. J., Kinney, J. W. & Cummings, J. L. Alzheimer's disease biomarkers:  
690 Correspondence between human studies and animal models. *Neurobiology of Disease*  
691 **56**, 116–130 (2013).
- 692 65. Grossi, D., Lopez, O. L. & Martinez, A. J. Mammillary bodies in Alzheimer's disease. *Acta*  
693 *Neurol.Scand.* **80**, 41–45 (1989).
- 694 66. Sullivan, E. V *et al.* In vivo mammillary body volume deficits in amnesic and nonamnesic  
695 alcoholics. *Alcohol. Clin. Exp. Res.* **23**, 1629–36 (1999).
- 696 67. Sullivan, E. V. & Pfefferbaum, A. Neuroimaging of the Wernicke-Korsakoff syndrome.  
697 *Alcohol Alcohol.* **44**, 155–165 (2009).
- 698 68. Beh, S. C., Frohman, T. C. & Frohman, E. M. Isolated mammillary body involvement on  
699 MRI in Wernicke's encephalopathy. *J. Neurol. Sci.* **334**, 172–175 (2013).
- 700 69. Nahum, L. *et al.* Neural Correlate of Anterograde Amnesia in Wernicke's??Korsakoff  
701 Syndrome. *Brain Topogr.* **28**, 760–770 (2015).
- 702 70. Kim, E. *et al.* Restoration of mammillothalamic functional connectivity through thiamine  
703 replacement therapy in Wernicke's encephalopathy. *Neurosci. Lett.* **479**, 257–261 (2010).
- 704 71. Laxton, A. W. *et al.* A phase I trial of deep brain stimulation of memory circuits in  
705 Alzheimer's disease. *Ann. Neurol.* **68**, 521–534 (2010).
- 706 72. Roy, D. S. *et al.* Memory retrieval by activating engram cells in mouse models of early  
707 Alzheimer's disease. *Nature* (2016). doi:10.1038/nature17172
- 708 73. Fischer, A., Sananbenesi, F., Wang, X., Dobbin, M. & Tsai, L.-H. Recovery of learning  
709 and memory is associated with chromatin remodelling. *Nature* **447**, 178–82 (2007).
- 710 74. Ye, L. *et al.* Progression of Seed-Induced Abeta Deposition within the Limbic  
711 Connectome. *Brain Pathol.* **25**, 743–752 (2015).
- 712 75. Iaccarino, H. F. *et al.* Gamma frequency entrainment attenuates amyloid load and  
713 modifies microglia. *Nature* **540**, 230–235 (2016).
- 714 76. Tomer, R., Ye, L., Hsueh, B. & Deisseroth, K. Advanced CLARITY for rapid and high-  
715 resolution imaging of intact tissues. *Nat. Protoc.* **9**, 1682–97 (2014).
- 716 77. Yang, B. *et al.* Single-cell phenotyping within transparent intact tissue through whole-  
717 body clearing. *Cell* **158**, 945–958 (2014).
- 718 78. Smith, K. *et al.* CIDRE: an illumination-correction method for optical microscopy. *Nat.*  
719 *Methods* **1**, 1–7 (2015).
- 720 79. Bria, A. & Iannello, G. TeraStitcher - a tool for fast automatic 3D-stitching of teravoxel-  
721 sized microscopy images. *BMC Bioinformatics* **13**, 316 (2012).
- 722 80. Schindelin, J. *et al.* Fiji: an open-source platform for biological-image analysis. *Nat.*  
723 *Methods* **9**, 676–82 (2012).
- 724



725 Supplementary Figure 1 – supporting Figure 1

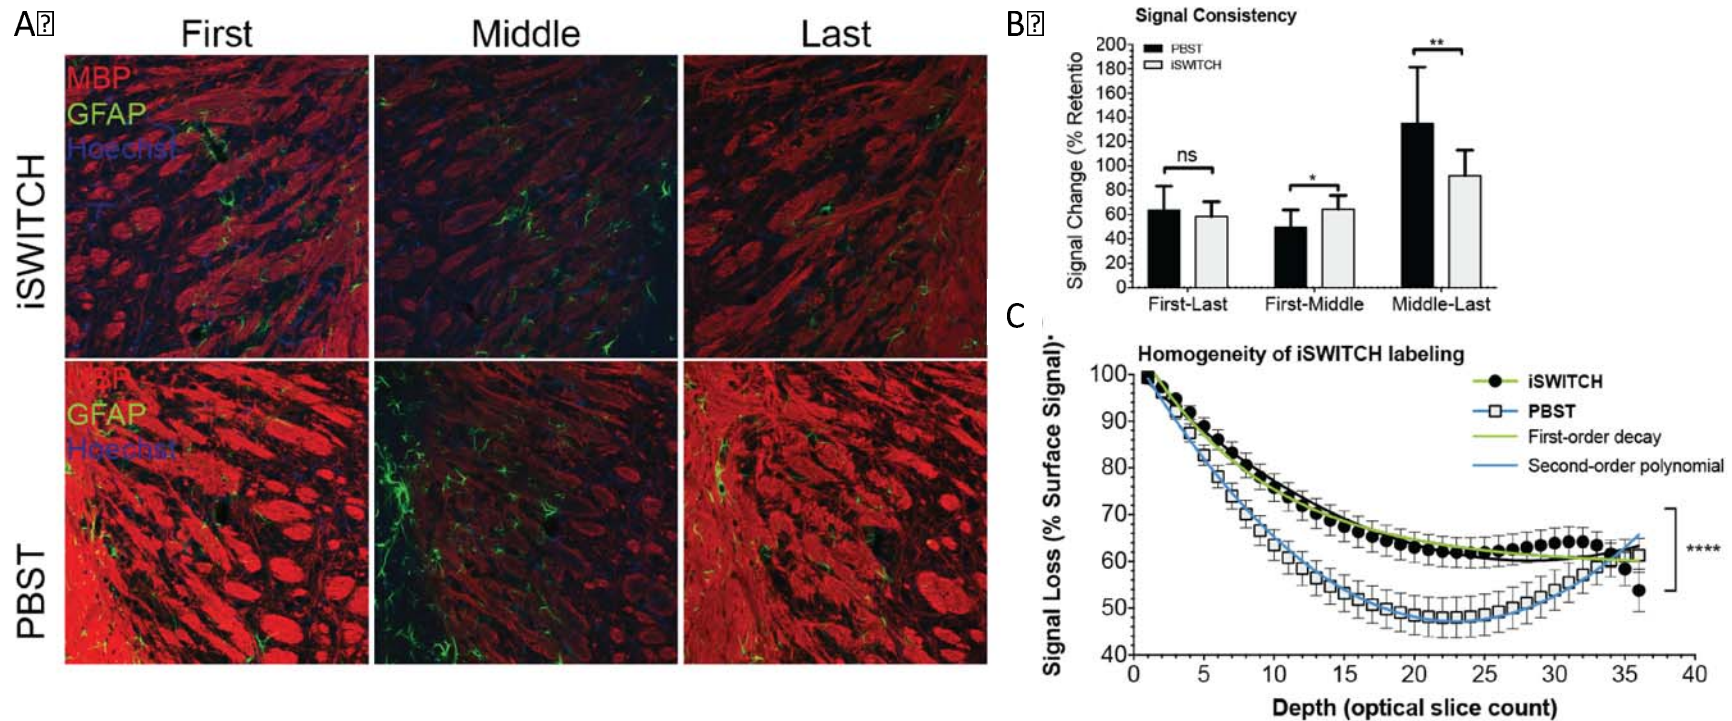

**Supplemental Figure 1: Optimized iSWITCH enhances immunolabeling homogeneity in 100um sections.** A) Representative optical sections from the first (left), middle (center), and last (right) slices of z-stack image files taken from tissue labeled for myelin basic protein (MBP, red) glial fibrillary acidic protein (GFAP, green), and with Hoechst dye (blue) using either iSWITCH buffers (top) or traditional labeling buffer phosphate buffered saline with triton x-100 (PBST, bottom). B) Quantification of MBP labeling demonstrating signal intensity consistency between the first and last sections under both conditions (left), but enhanced middle section immunolabeling signal when compared to either the intensity of the first (center) or last (right) section. C) Immunofluorescent signal loss throughout the depth of the sections is first order decay using iSWITCH buffers, indicating relatively homogenous signal with intensity that decays with depth due to laser attenuation, but using PBST the loss is a second order polynomial, indicating non-homogenous signal intensity through the thickness of the tissue. \* $p \leq 0.05$ ; \*\* $p \leq 0.01$ ; \*\*\*\* $p \leq 0.0001$ ; Graphs report Mean  $\pm$  Standard Deviation.

726 Supplementary Figure 2 – supporting Figure 1

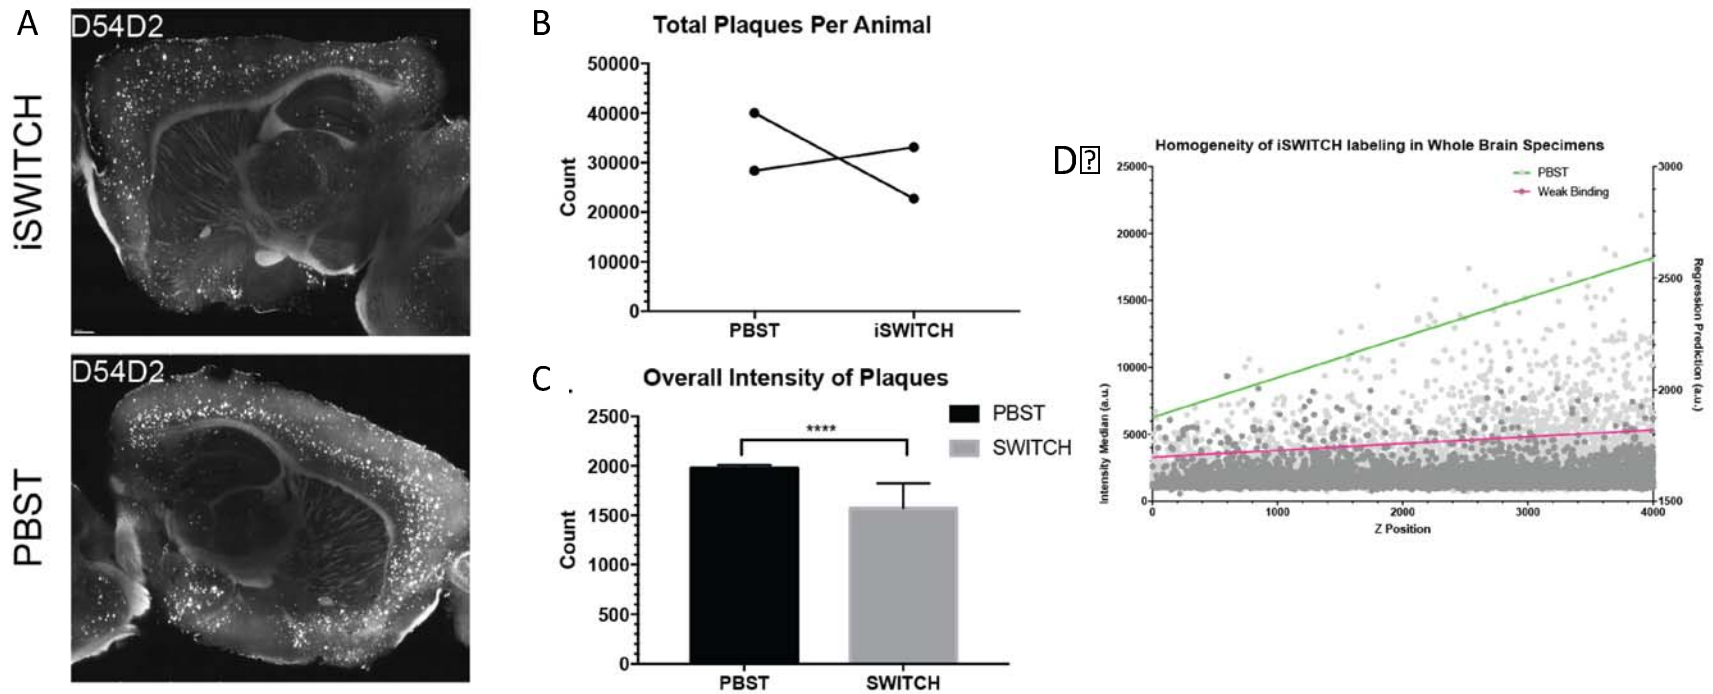

**Supplemental Figure 2: iSWITCH buffer immunolabeling whole brain for  $\beta$ -amyloid achieves homogenous signal.** Aged 5XFAD brain was split into two hemispheres and labeled with either iSWITCH buffers or PBST. A) Representative images from the center section of each hemisphere. B) Demonstration of the consistency of overall aggregate counts between animals and no consistent effect of PBST or iSWITCH on aggregate detection. C) Aggregates labeled by iSWITCH show overall lower intensity, which may be driven by more antibody availability for surface antigens. D) Plot of the intensity of aggregates detected through sample (left axis) with regression (right axis) showing non-homogenous signal intensities in PBST labeled brains, which is rectified using iSWITCH buffers. Graphs report Mean  $\pm$  Standard Deviation unless otherwise noted in the text.

727

Supplementary Figure 3 – Supporting Figure 1

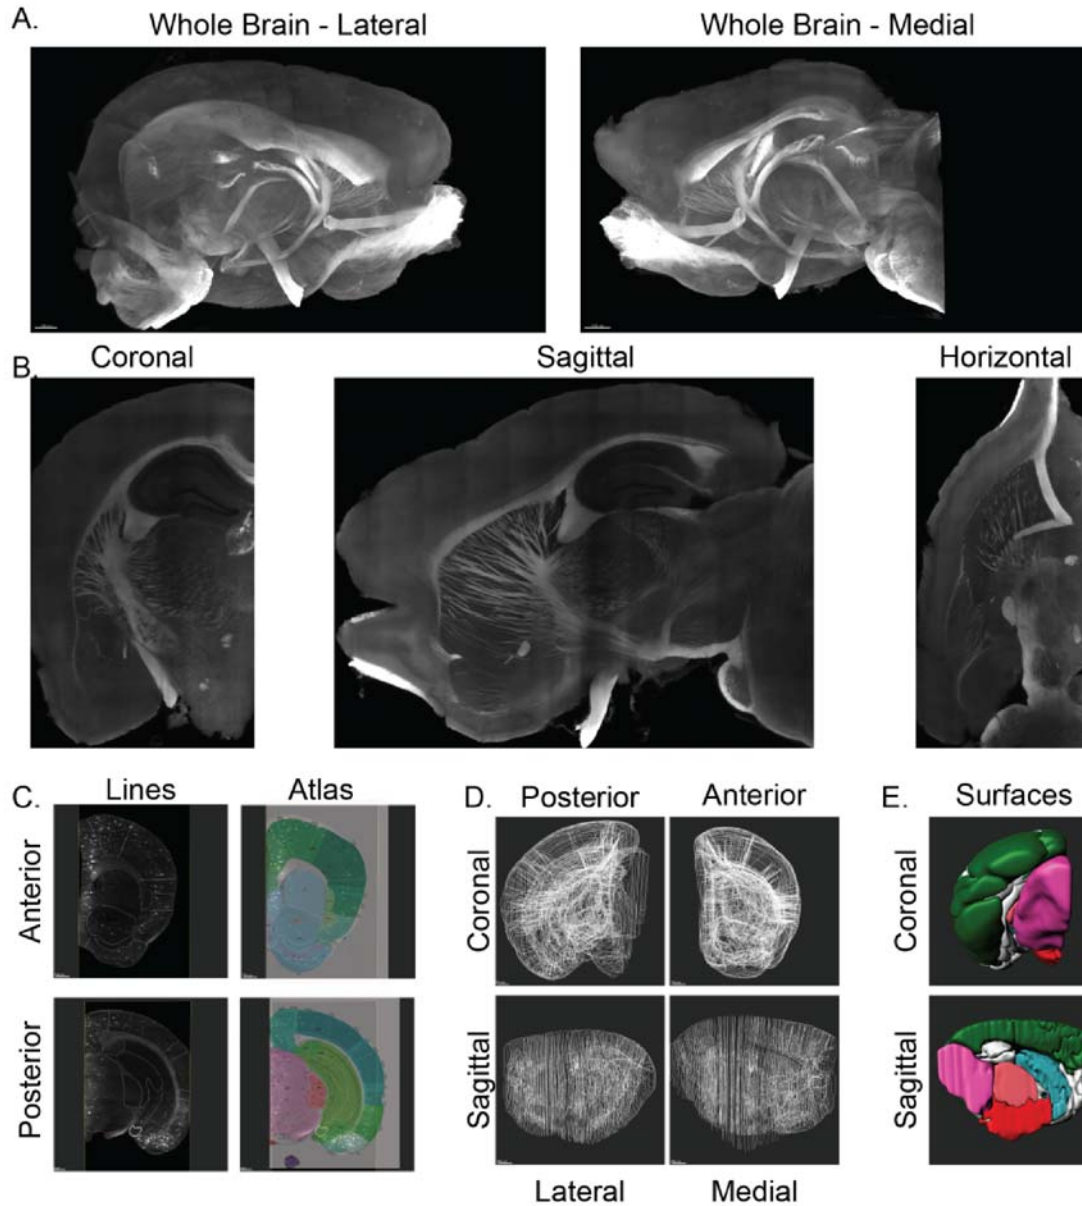

**Supplemental Figure 3: White-matter based hand segmentation of brain areas provides robust identification of specific regions.** A) 3D rendering of white matter tracts in the whole mouse brain. B) Optical slice-wise visualization of white matter tracts. C) Representative examples of hand-segmentation (left) next to the Allen Mouse Brain Atlas section (right, anterior section #43, posterior section #85) from which they were drawn. Website: © 2015 Allen Institute for Brain Science. Allen Mouse Brain Atlas [Internet]. Available from: <http://mouse.brain-map.org><sup>311</sup> D) Representative images showing the whole-brain segmentation. E) Representative images of the volume-rendered segmentation.

Supplementary Figure 4 – supporting Figure 1

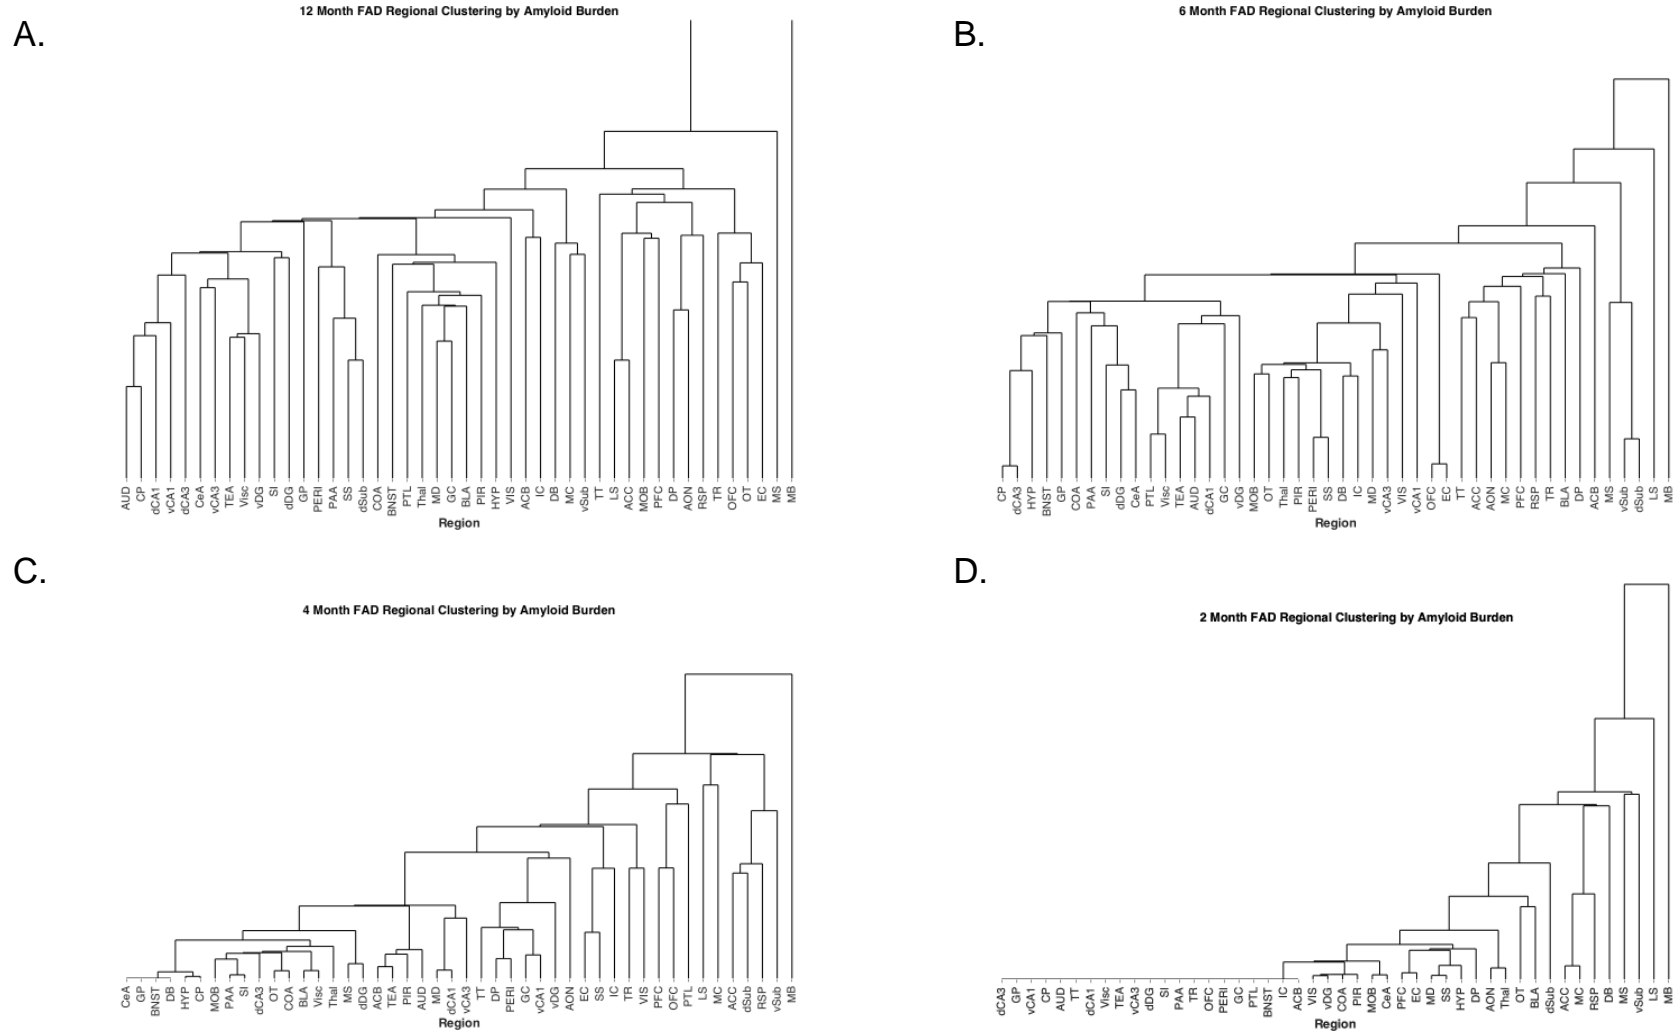

**Supplemental Figure 5: Hierarchical clustering at each age reveals amyloid deposition within networks appears with age.** A-D) Dendrograms of hierarchical clustering of amyloid density at each age examined in the 5XFAD mice. A) 12 months. B) 6 months C) 4 months and D) 2 months aged animals.

729

Supplementary Figure 5 – supporting Figure 1

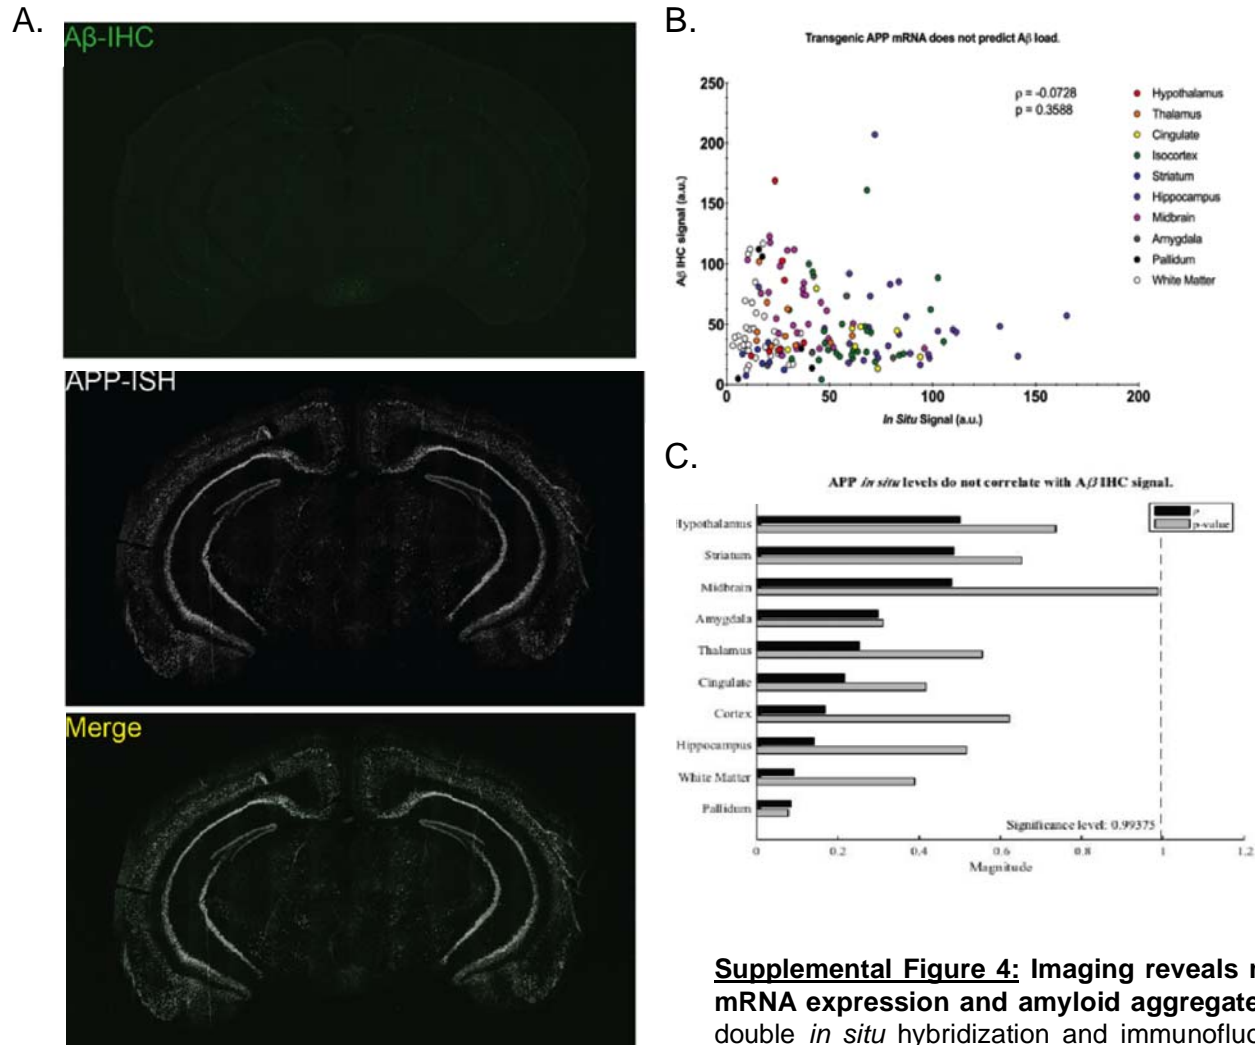

**Supplemental Figure 4: Imaging reveals no correlation between transgenic mRNA expression and amyloid aggregates .** A) Representative images of the double *in situ* hybridization and immunofluorescence. B) Brain-wide correlation graph demonstration lack of correlation between signals. C) Correlation coefficients split by region and displayed with p-value.
